# Supplementary material for: Evolutionary instability of CUG-Leu in the genetic code of budding yeasts
Source: PubMed Central journal article supplement (PMC5951914; doi:10.1038/s41467-018-04374-7), 2018-05-14

### BLAST-based prediction

### LC-MS/MS validation

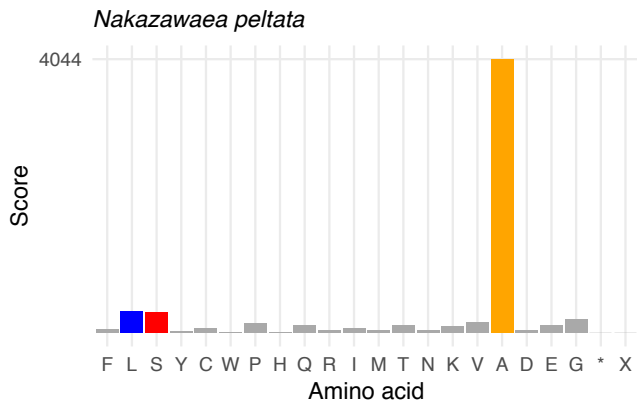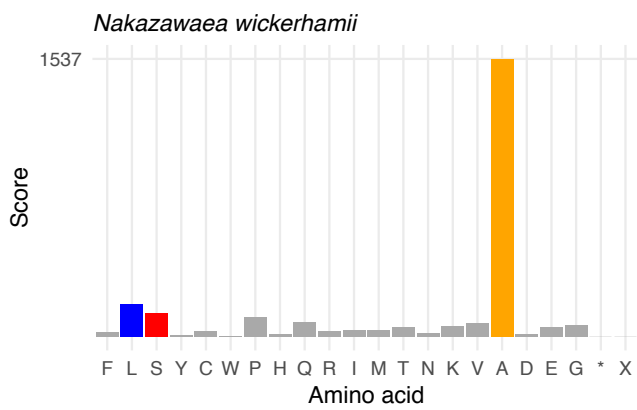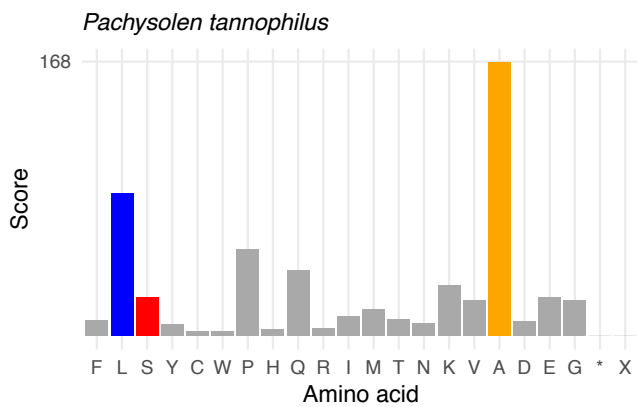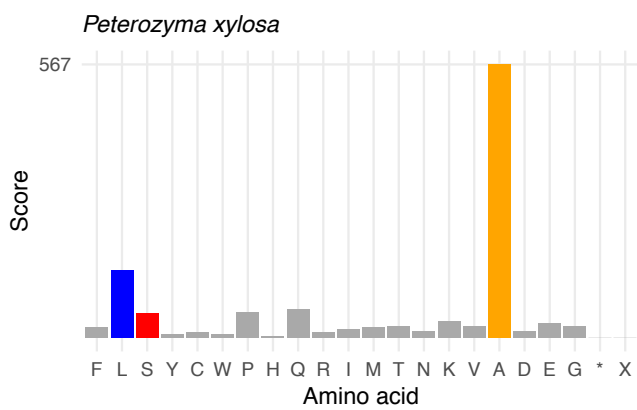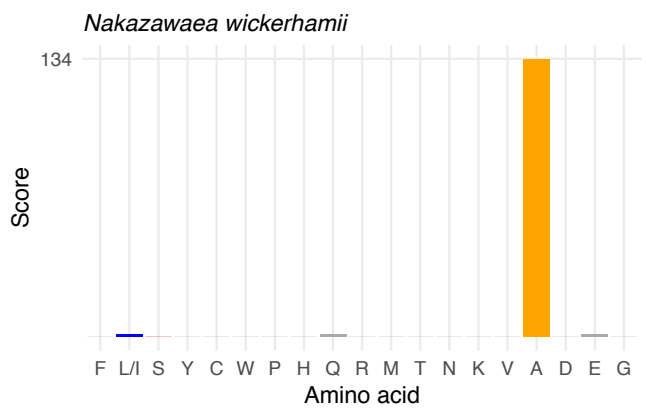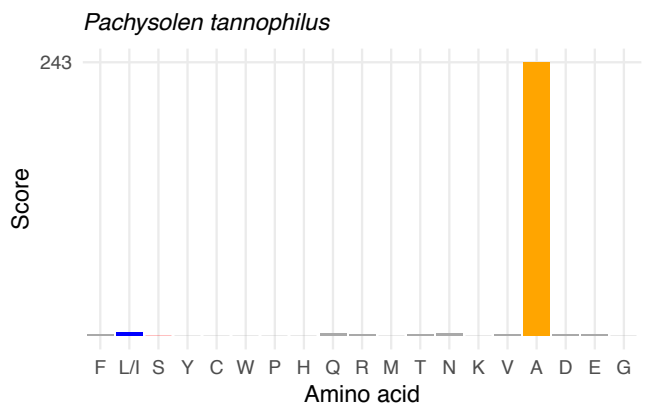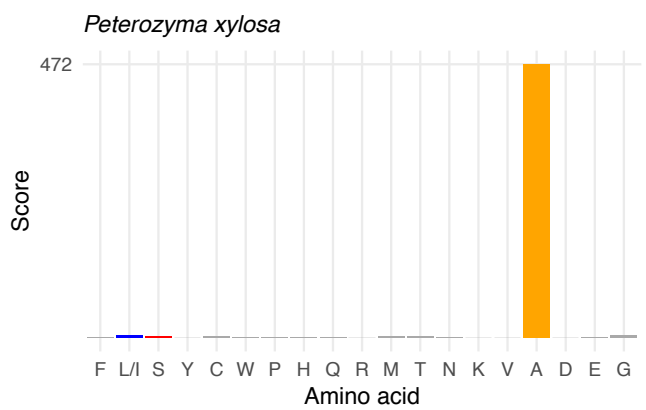

(a) Ala clade

### BLAST-based prediction

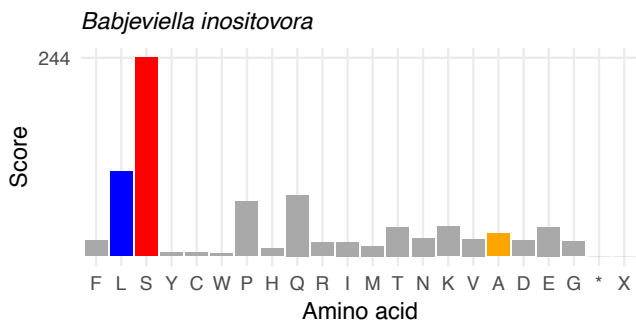

### LC-MS/MS validation

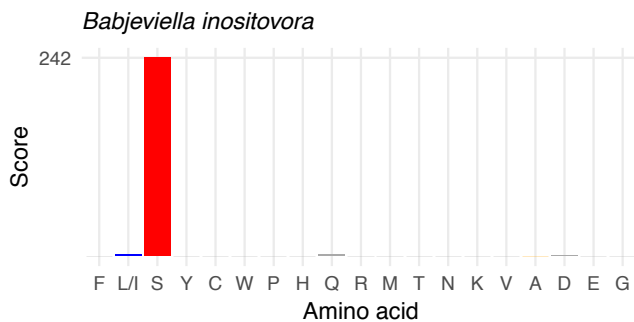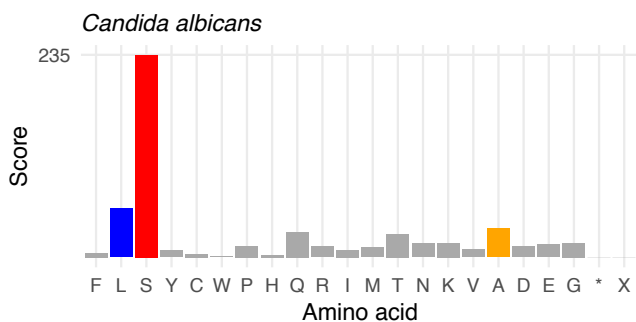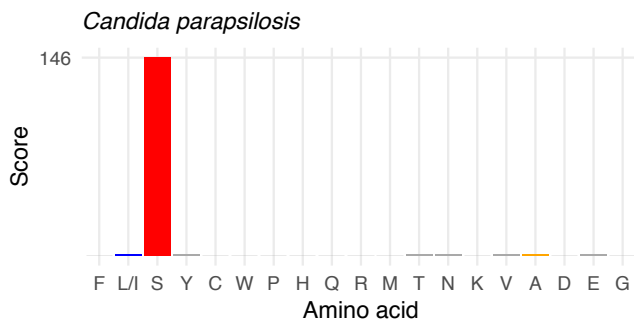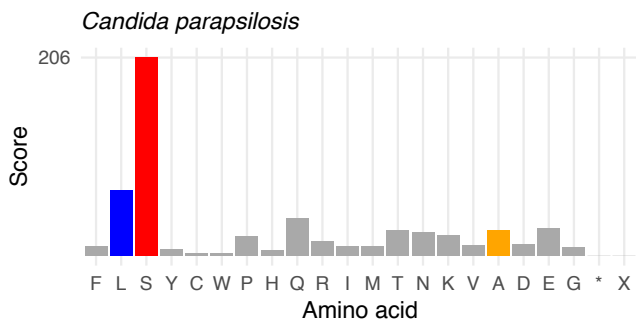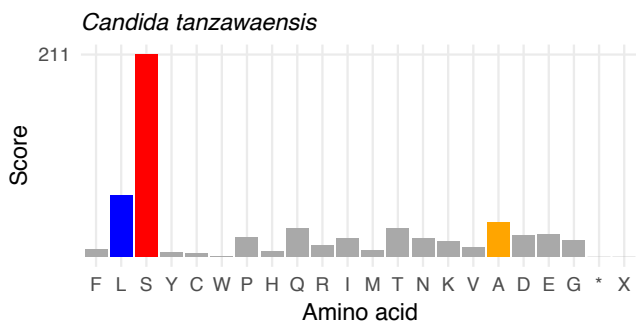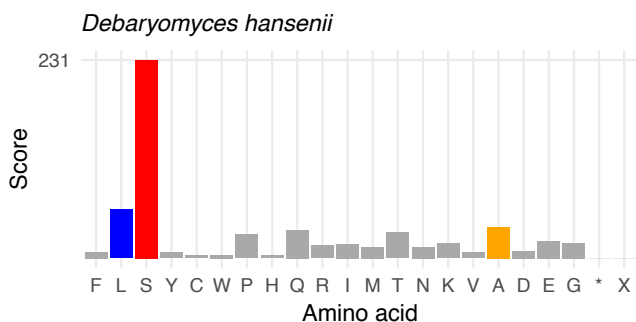

## BLAST-based prediction

## LC-MS/MS validation

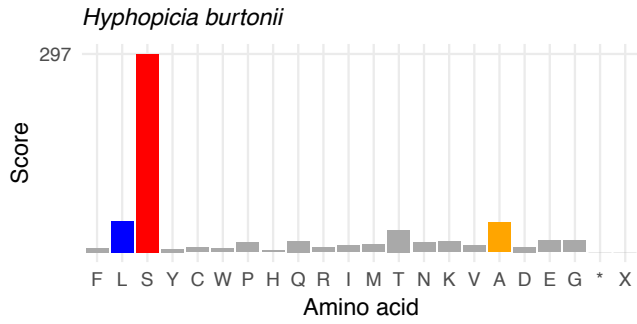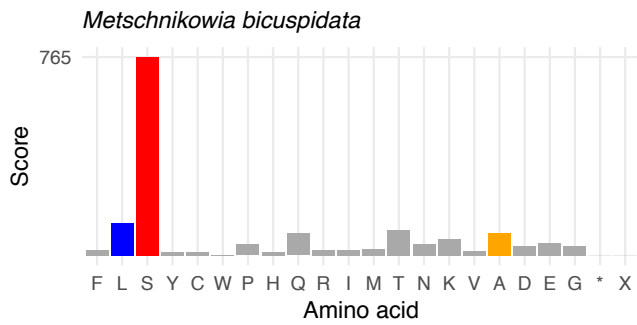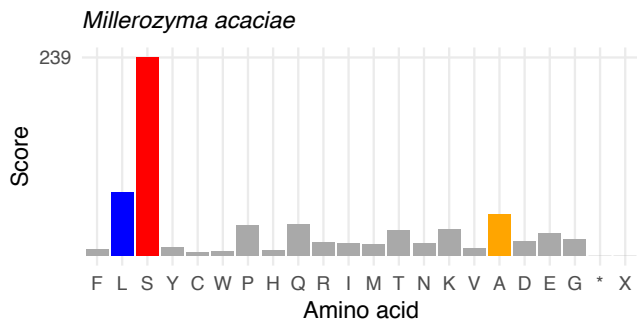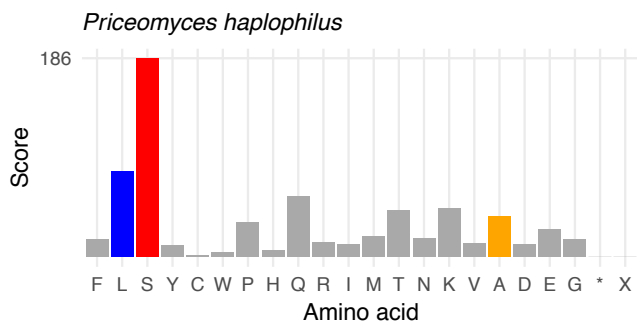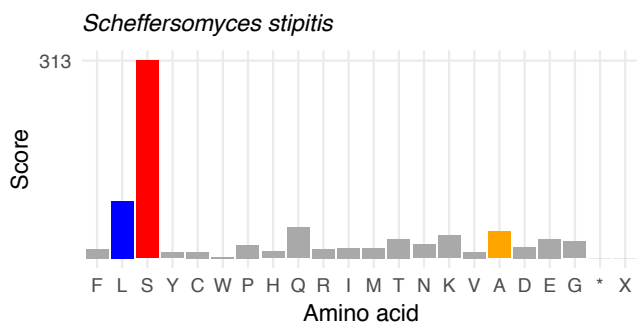

### BLAST-based prediction

### LC-MS/MS validation

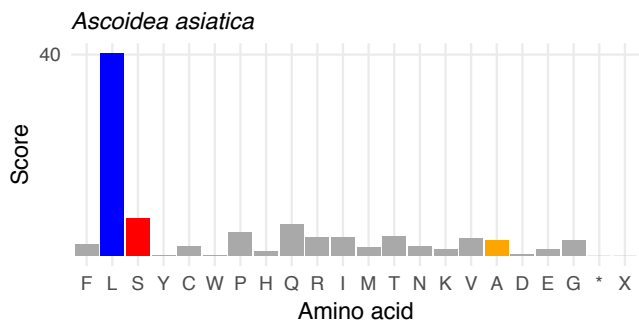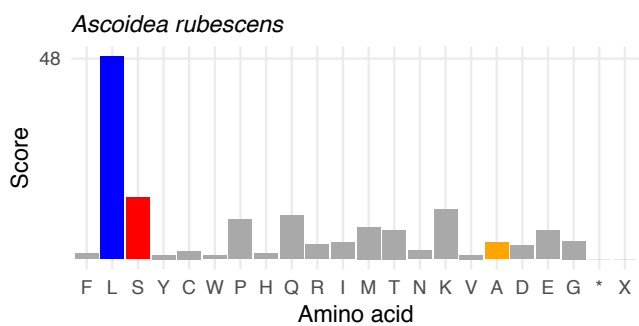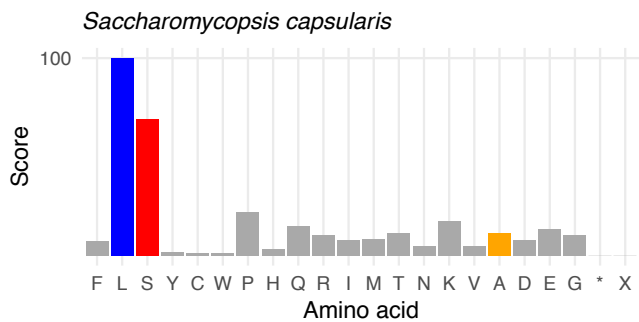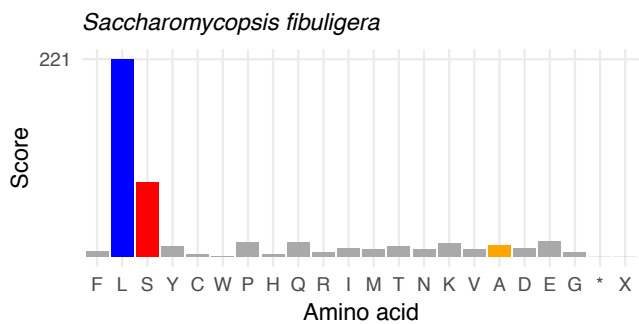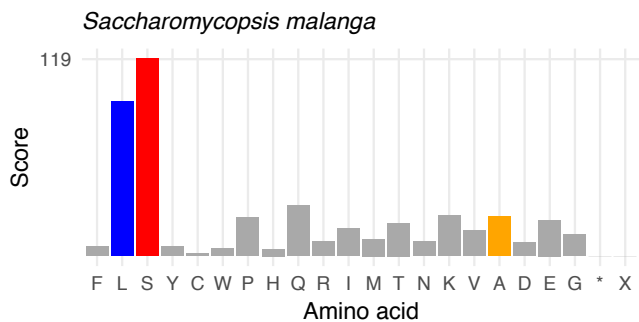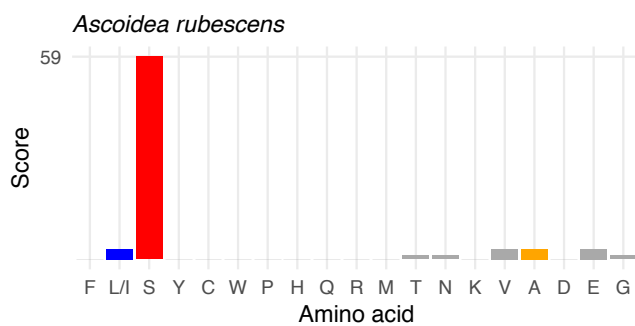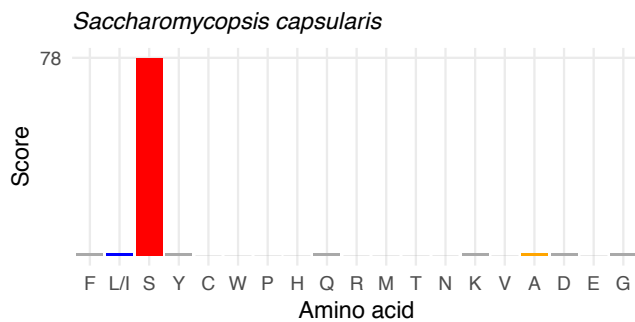

(d) Ser2 clade

### BLAST-based prediction

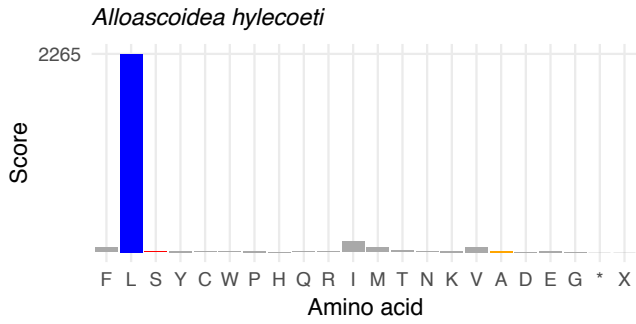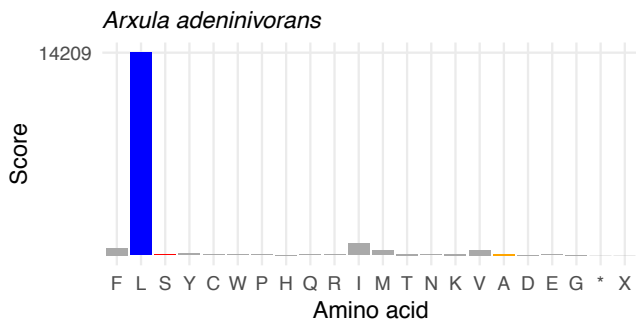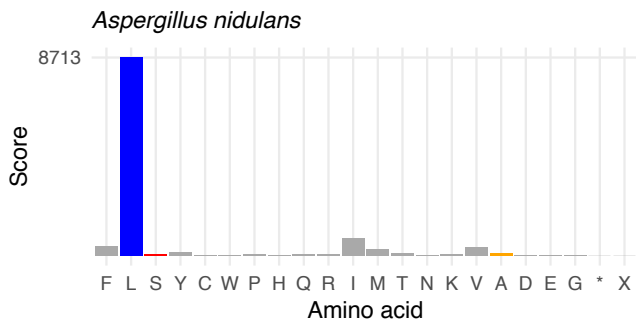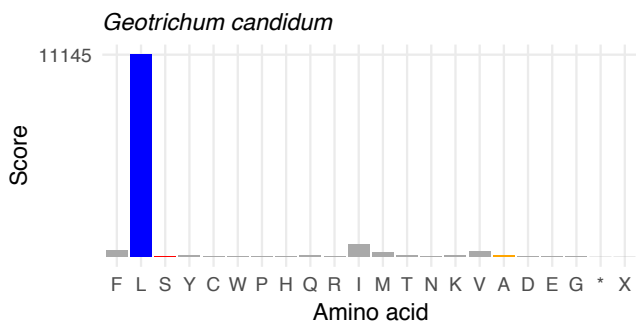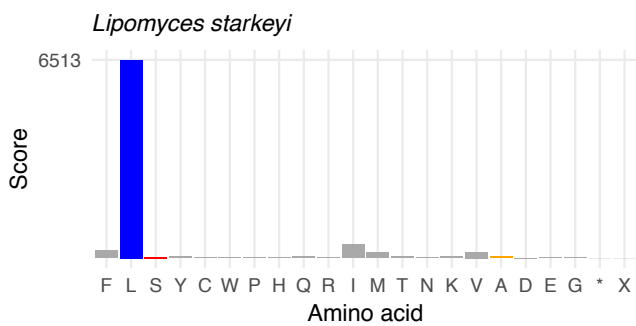

### LC-MS/MS validation

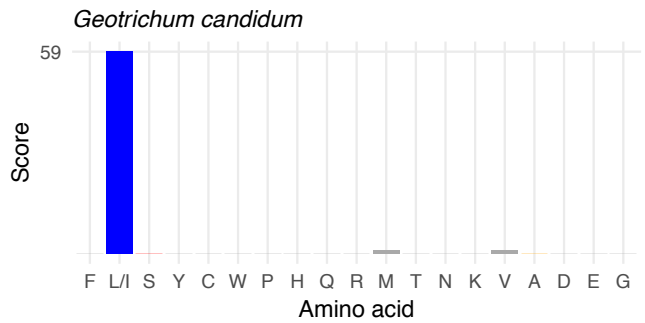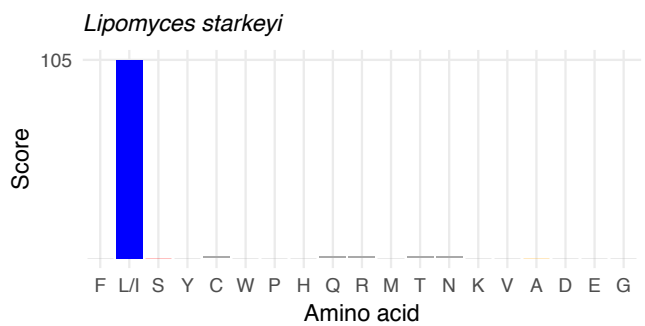

### BLAST-based prediction

### LC-MS/MS validation

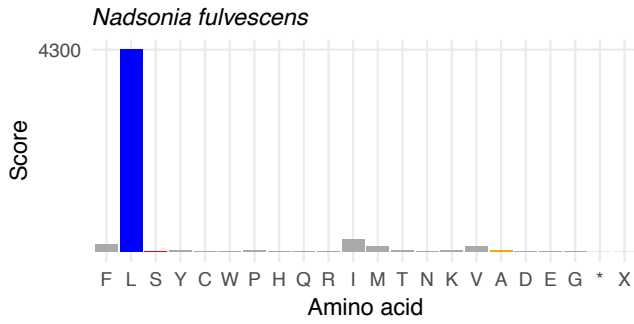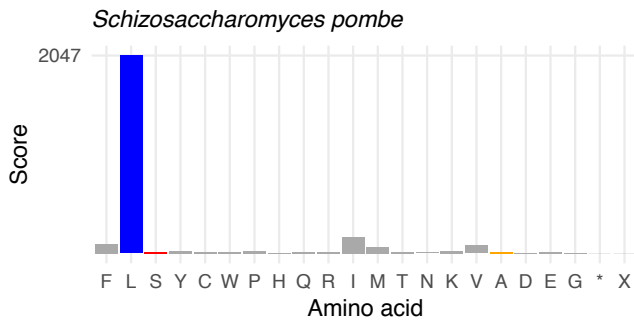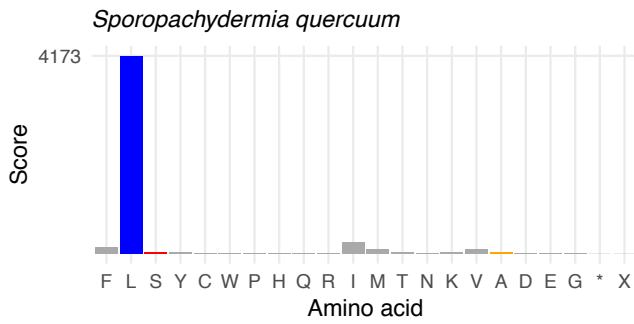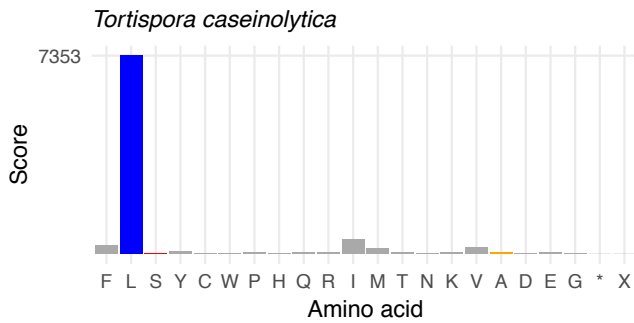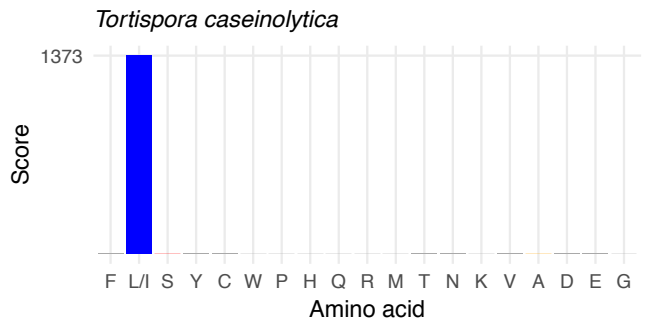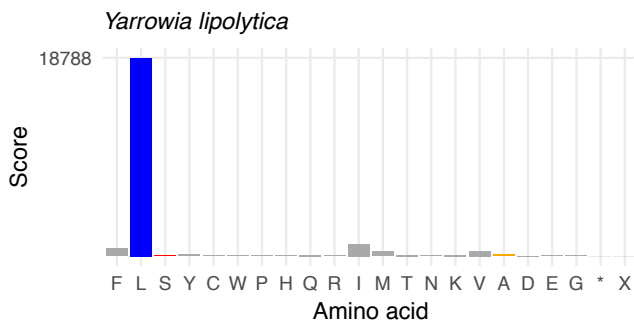

### BLAST-based prediction

### LC-MS/MS validation

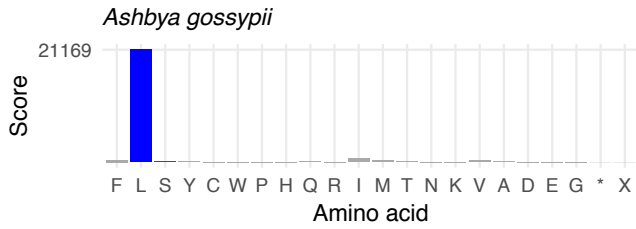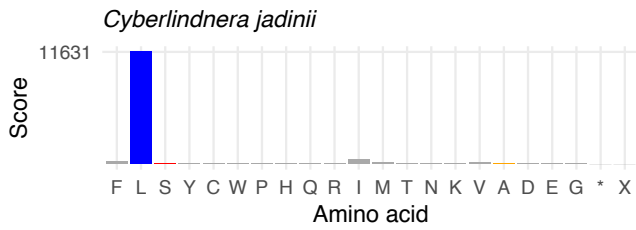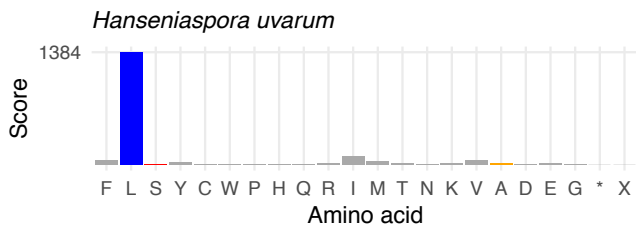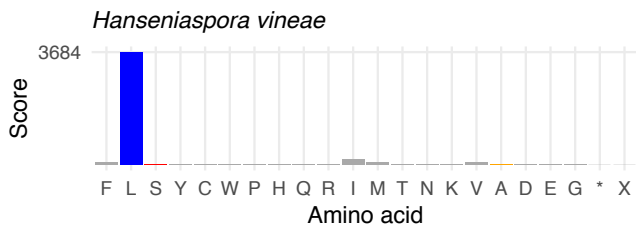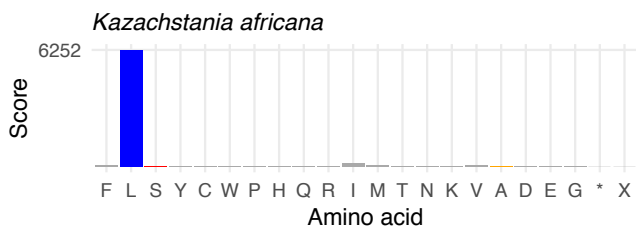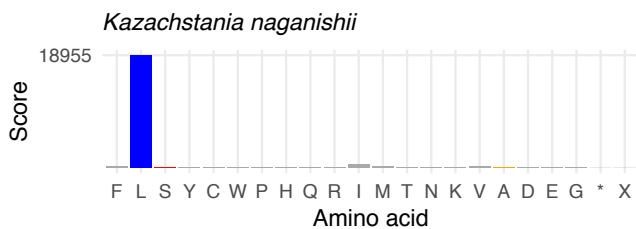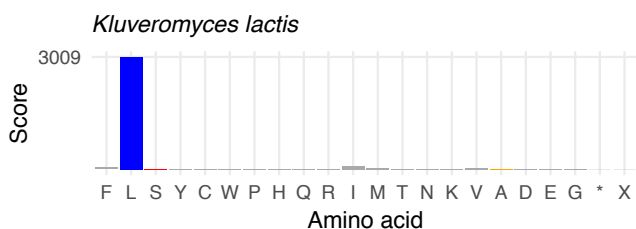

### BLAST-based prediction

### LC-MS/MS validation

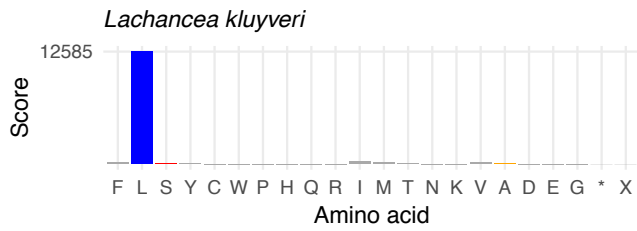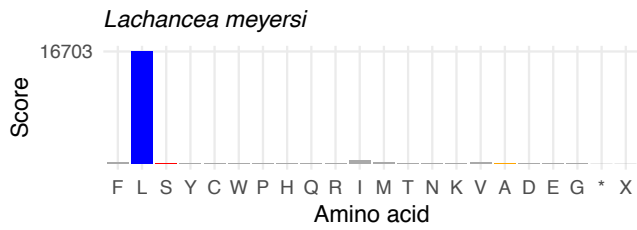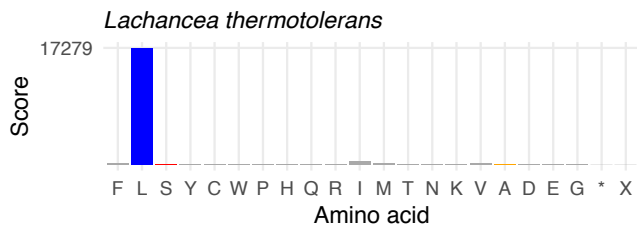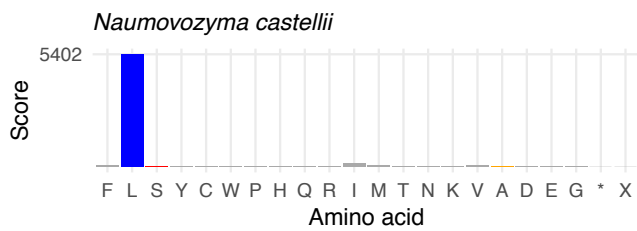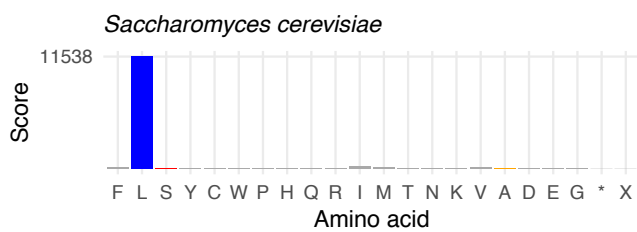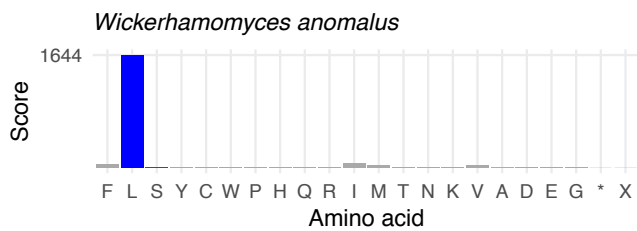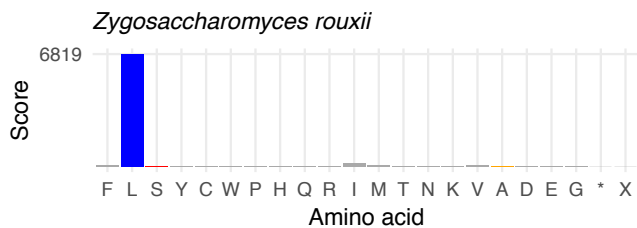



### BLAST-based prediction

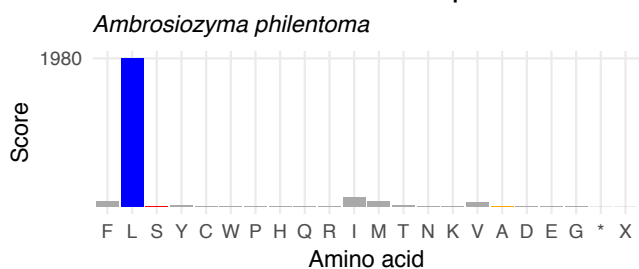

### LC-MS/MS validation

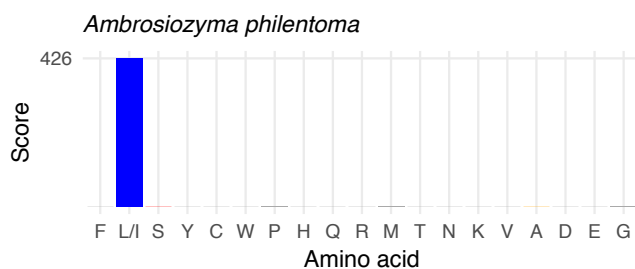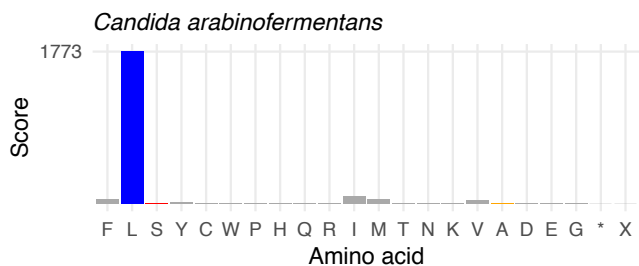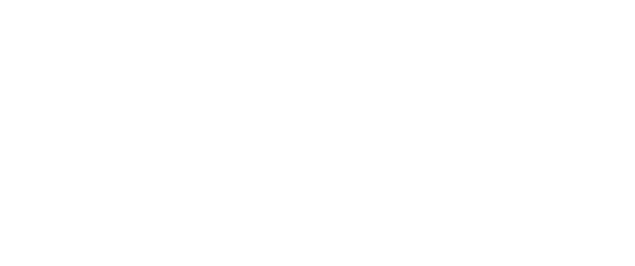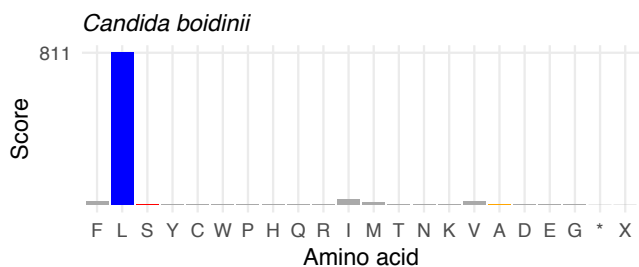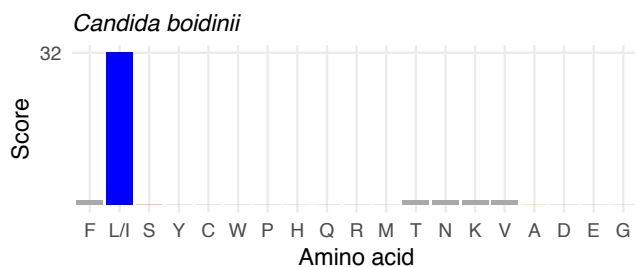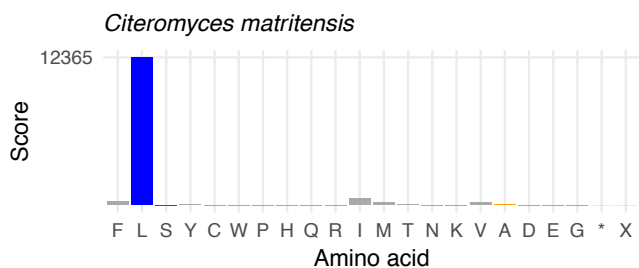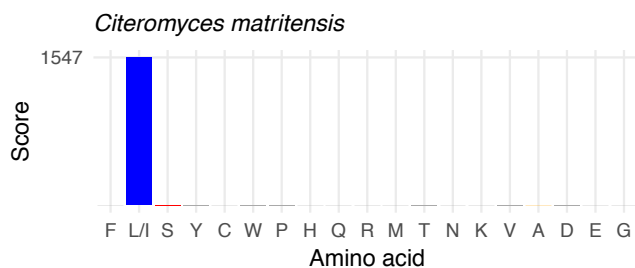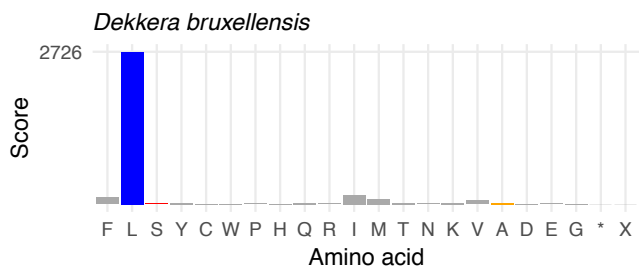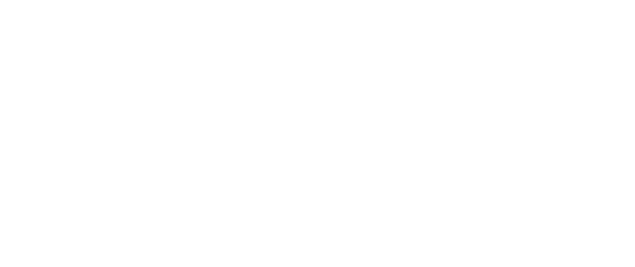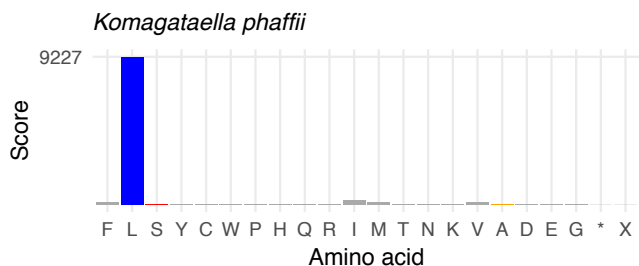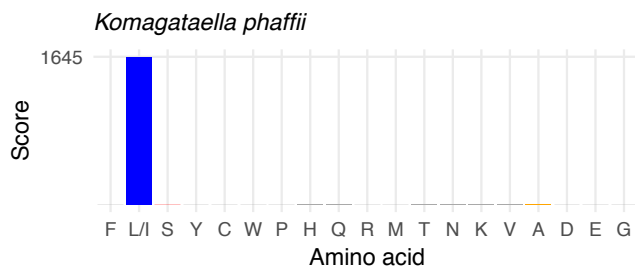

### BLAST-based prediction

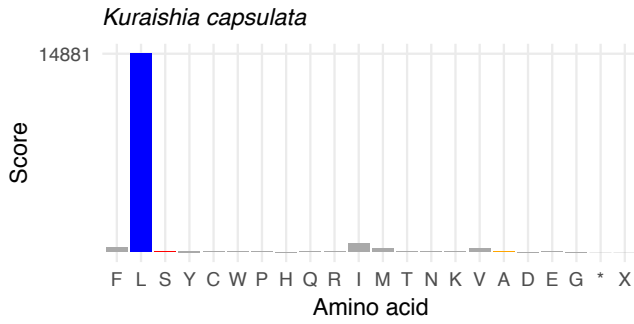

### LC-MS/MS validation

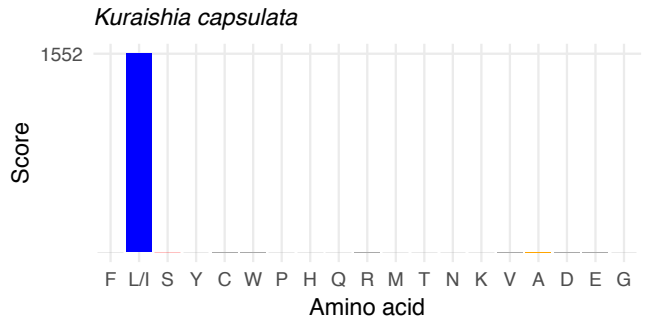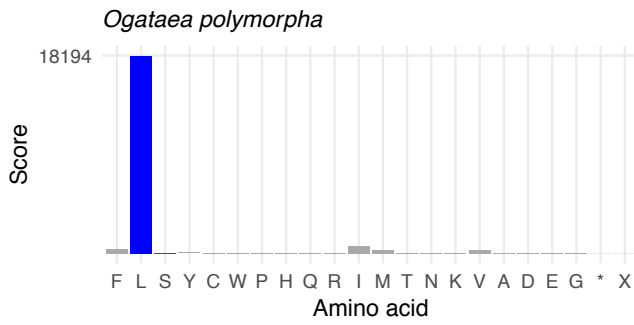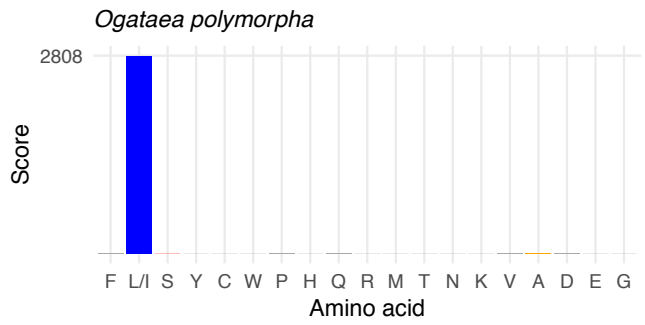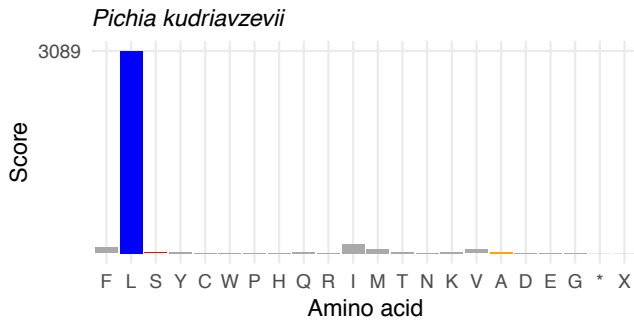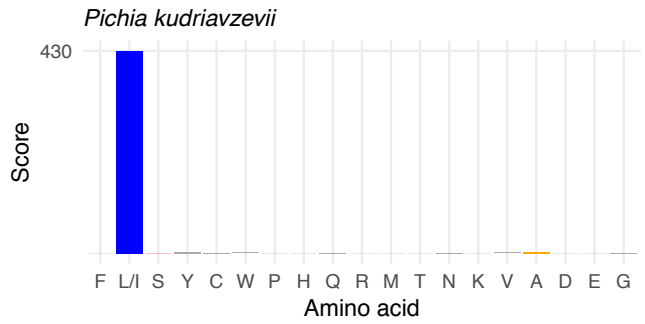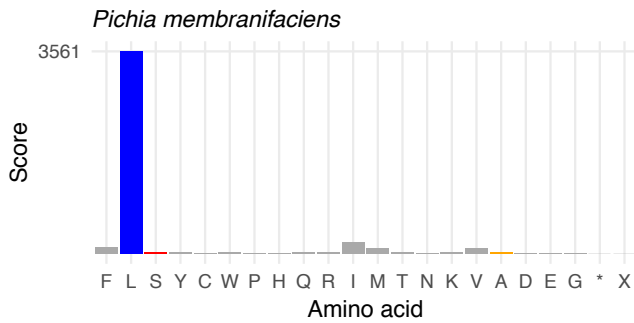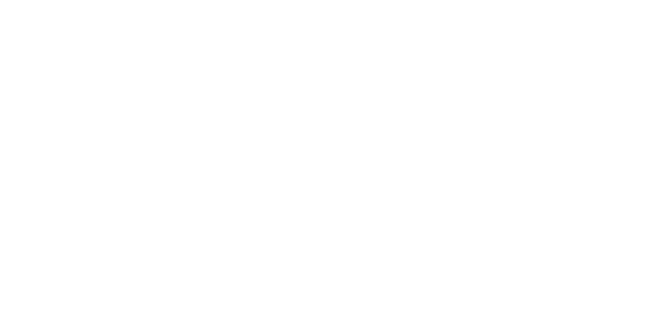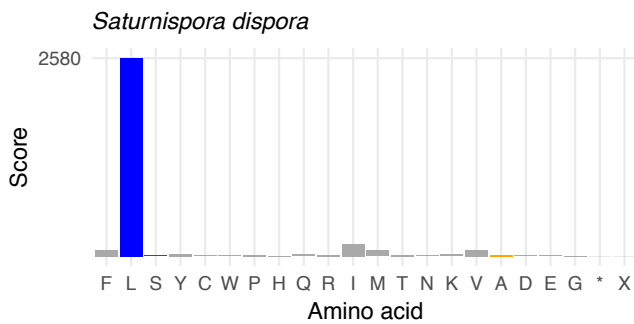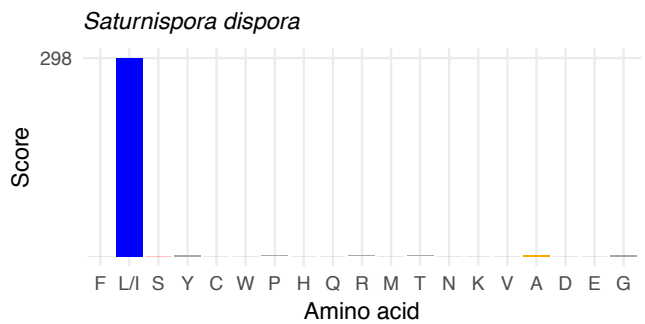

Supplement: 41467_2018_4374_MOESM3_ESM.pdf [file 41467_2018_4374_MOESM3_ESM.pdf]
