# Supplementary material for: Evolutionary instability of CUG-Leu in the genetic code of budding yeasts
Source: PubMed Central journal article supplement (PMC5951914; doi:10.1038/s41467-018-04374-7), 2018-05-14
Supplement: 41467_2018_4374_MOESM1_ESM.pdf [file 41467_2018_4374_MOESM1_ESM.pdf]

## **Supplementary Information**

### **Evolutionary Instability of CUG-Leu in the Genetic Code of Budding Yeasts**

Krassowski *et al.*

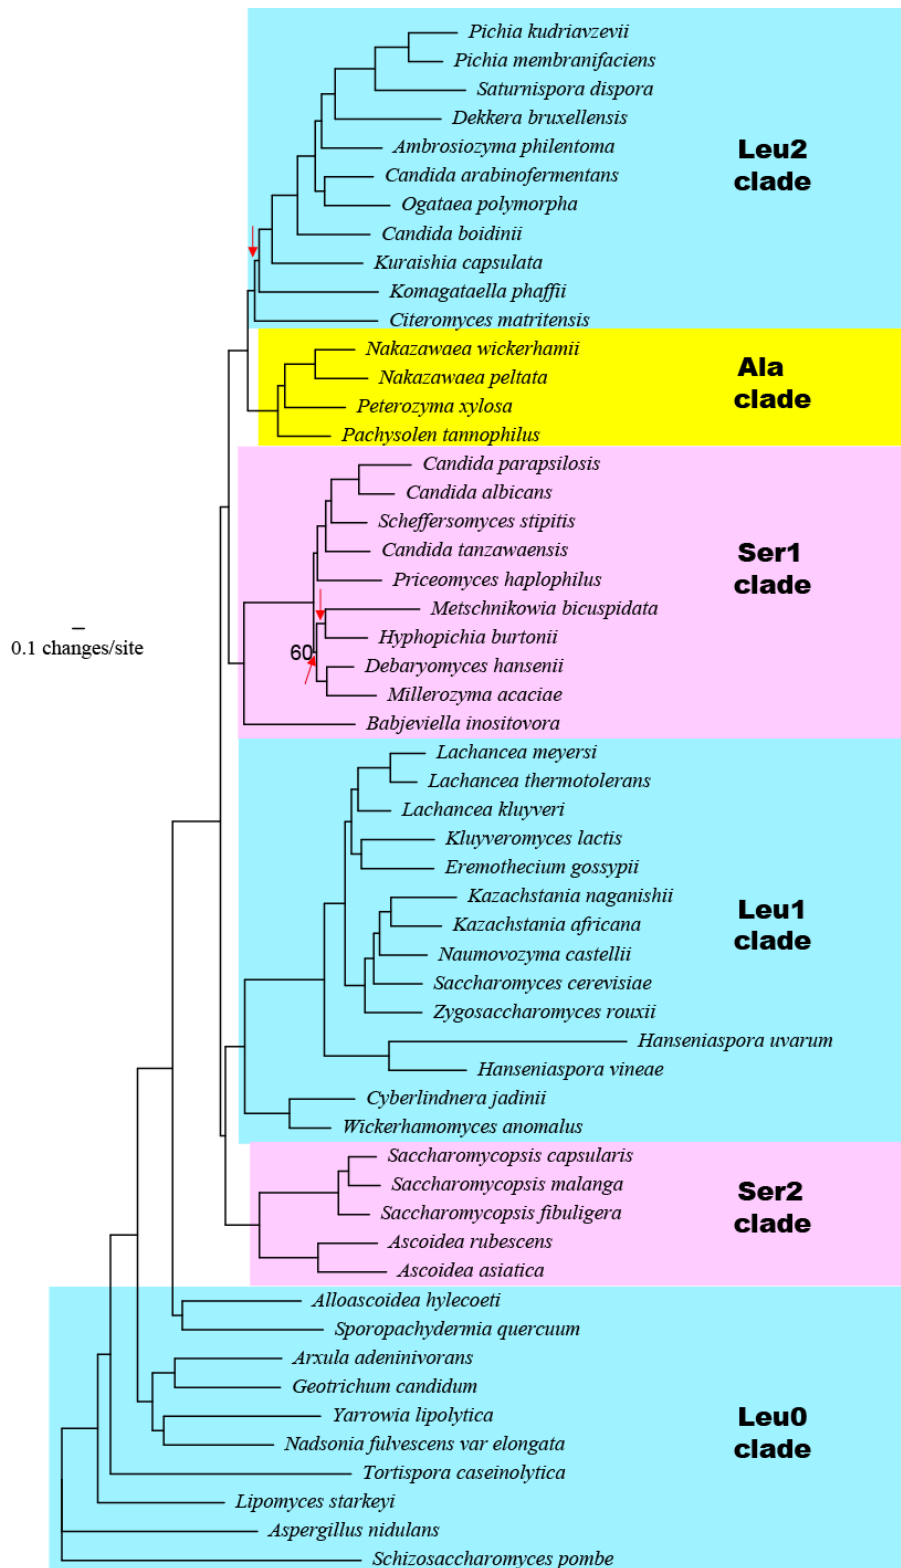

**Supplementary Fig. 1.** Phylogeny inferred from concatenated amino acid data matrix of 54 taxa and 1,237 genes under the site-heterogeneous ML model C60+LG+G4 implemented in IQ-TREE software. Nodes have 100% bootstrap support unless otherwise noted. Red colored arrows denote branches that conflict with the concatenation-based ML tree under the site-homogeneous model LG+G4 (Fig. 2). None of them occur between different clades. Specifically, two incongruent internodes occur within the Ser1 clade and one within the Leu2 clade.

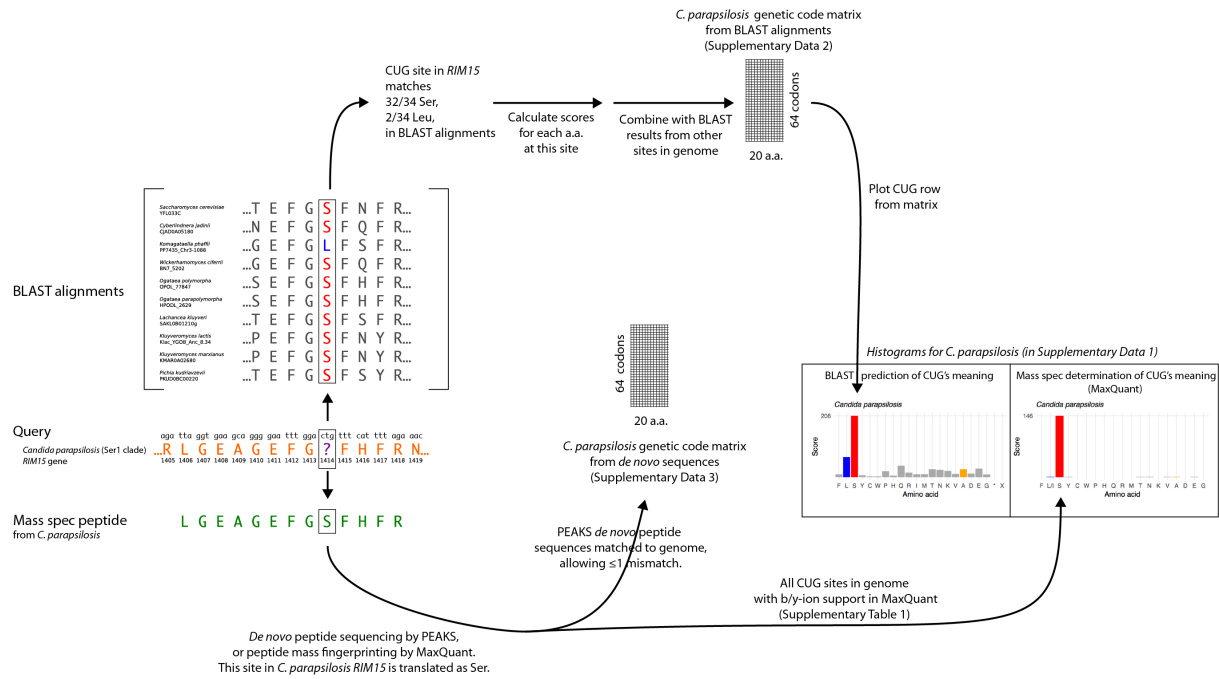

**Supplementary Fig. 2.** Summary of the methods used for bioinformatic prediction and LC-MS/MS confirmation of genetic codes. The Query line (orange) shows an example of a short section of the *RIM15* gene of *Candida parapsilosis*, which contains a CTG codon at position 1414 (boxed). Above this, BLAST alignments are shown for 10 of the 34 proteins in other species that aligned to it in the BLAST analysis. For the CTG at position 1414, 32 of the aligned proteins contained Ser and 2 contained Leu at this site, resulting in scores of 0.94 (32/34) for Ser and 0.06 (2/34) for Leu for this site in *C. parapsilosis RIM15*. Scores for every codon site in every gene in *C. parapsilosis*, excluding unreliable alignments, were totaled to generate a matrix of 64 codons x 20 amino acids (Supplementary Data 2), which is the bioinformatic prediction of the complete genetic code in *C. parapsilosis*. The row of the matrix corresponding to predicted translations of CUG is plotted as a histogram and shows that Ser (red bar) is the prediction with the highest score. In the lower section, a match between this region of *C. parapsilosis RIM15* and a *C. parapsilosis* peptide identified by mass spectrometry is shown, demonstrating that this CTG site in *RIM15* is translated as Ser. Peptides sequenced *de novo* using PEAKS were processed to compile an empirical 64 x 20 genetic code matrix from all matches between the peptide sequence and the genome (Supplementary Data 3). Peptides identified by mass fingerprinting using MaxQuant, that spanned a CUG site and had b/y-ion support for the amino acid at that site, were compiled (Supplementary Table 1) and CUG translation frequencies plotted as a histogram, showing that Ser (red bar) is the most common translation of CUG sites in detected *C. parapsilosis* peptides. Histograms for all species are in Supplementary Data 1.

### *Ascoidea rubescens*

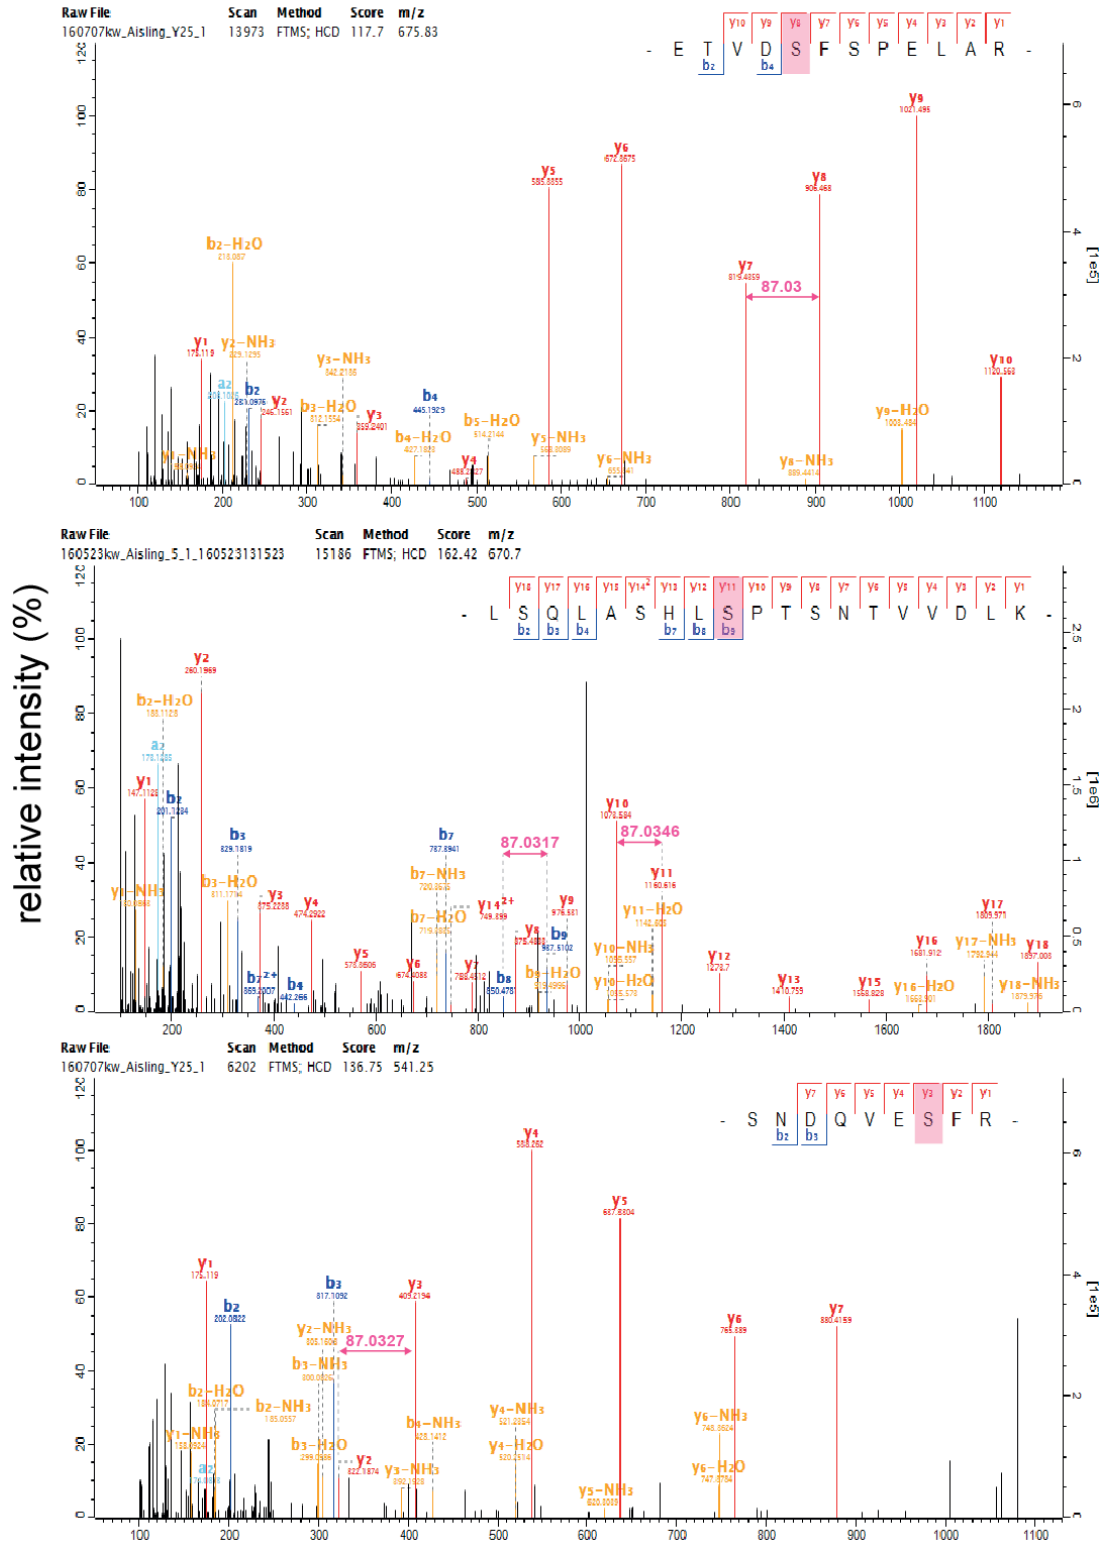

**Supplementary Fig. 3a.** Representative MS/MS spectra for non-standard genetic codes in *Ascoidea rubescens*. The identified peptide sequences are shown for three spectra, with matched y-ions in red and b-ions in blue. Amino acids translated from CUG are colored pink (serine) or yellow (alanine).

*Saccharomyces capsularis*

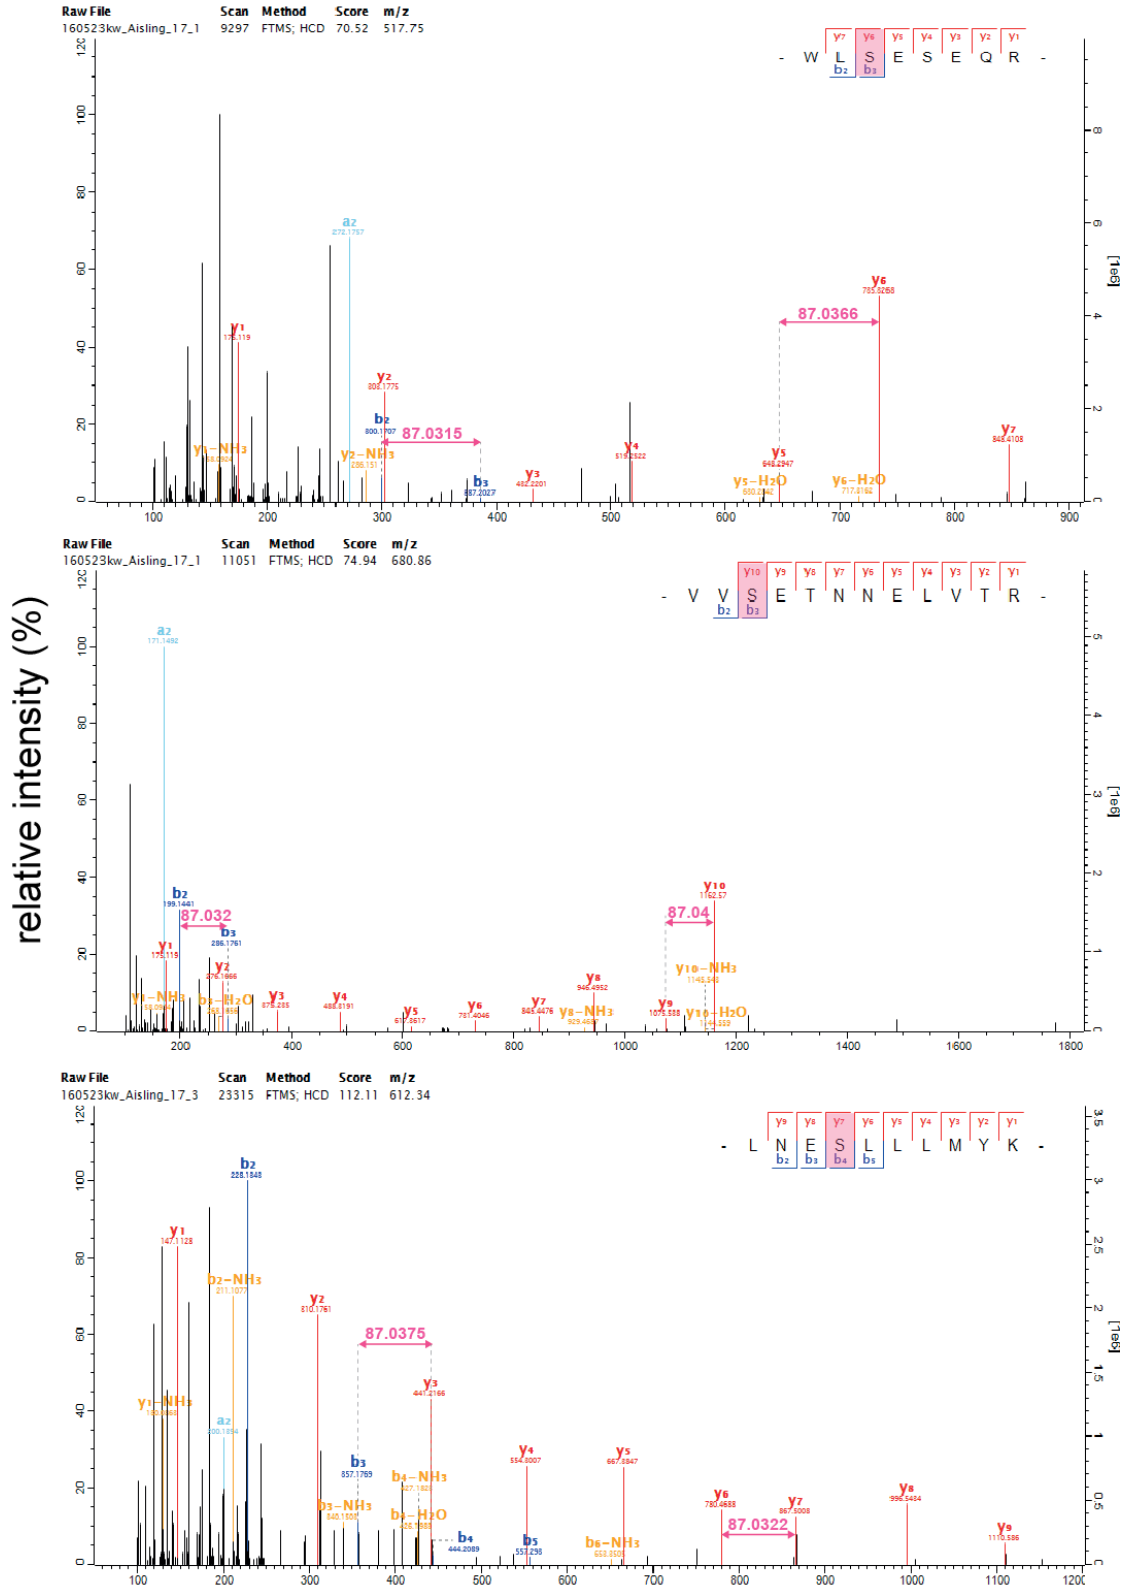

**Supplementary Fig. 3b.** Representative MS/MS spectra for non-standard genetic codes in *Saccharomyces capsularis*. The identified peptide sequences are shown for three spectra, with matched y-ions in red and b-ions in blue. Amino acids translated from CUG are colored pink (serine) or yellow (alanine).

### Babjeviella inositovora

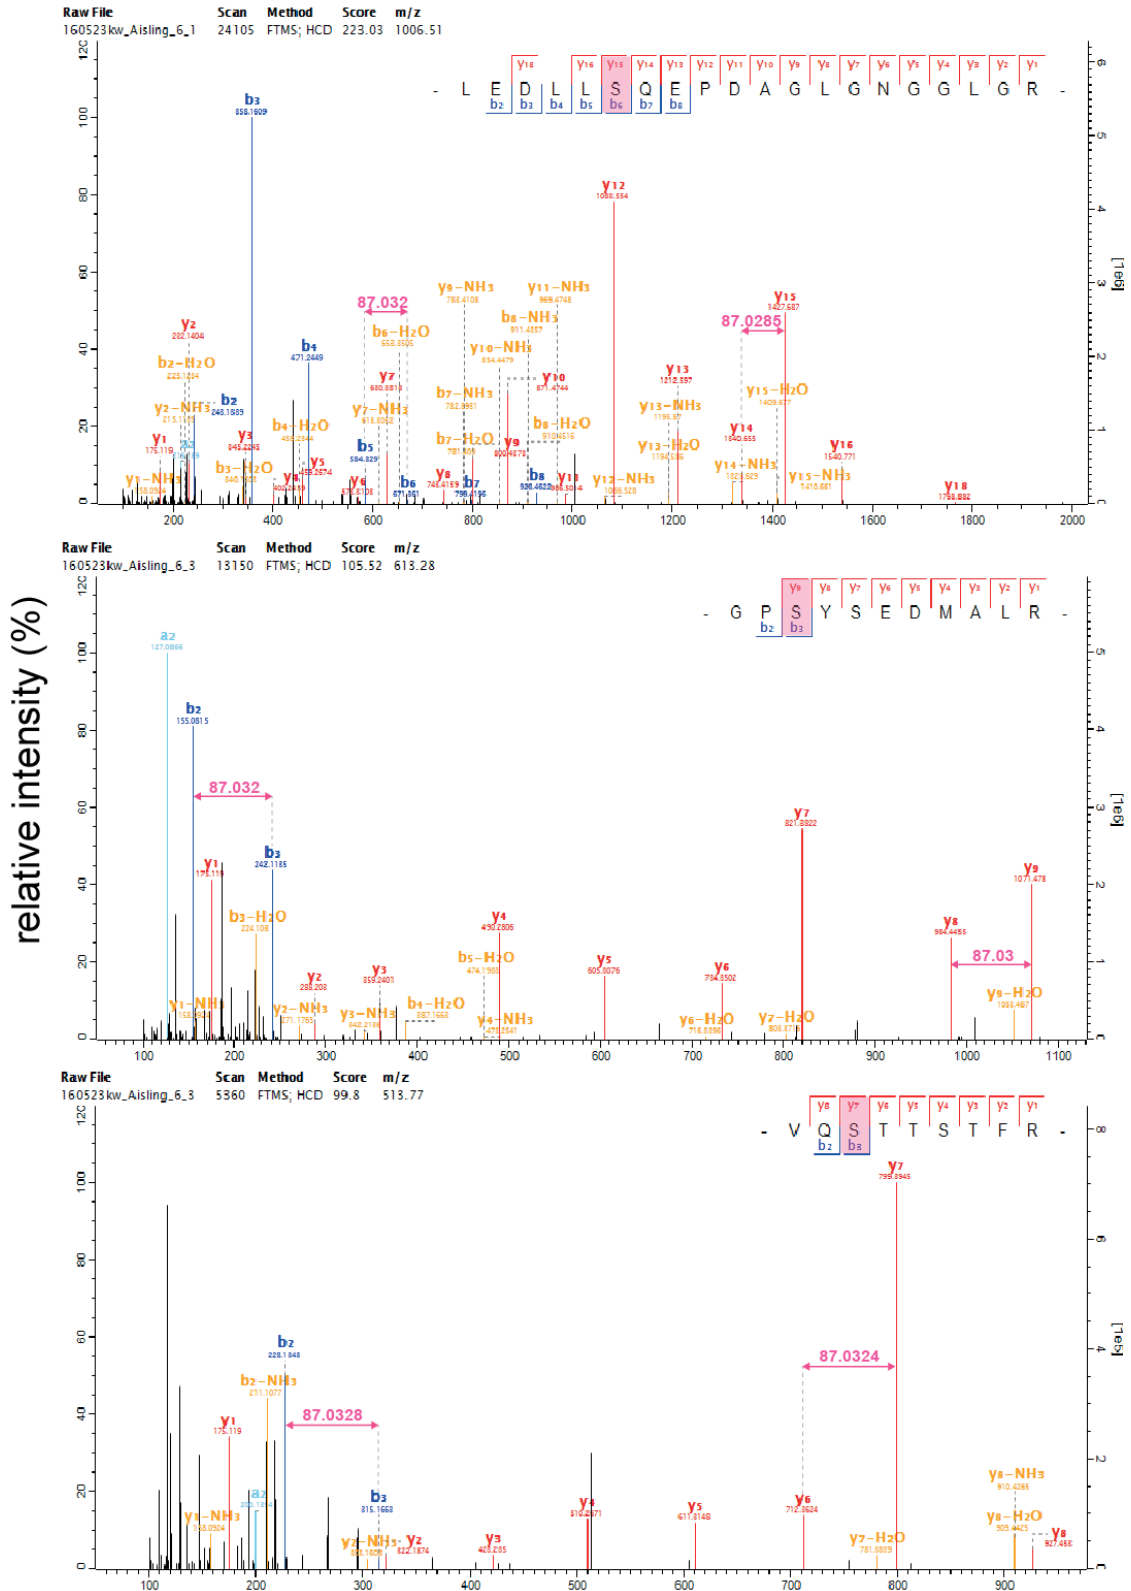

**Supplementary Fig. 3c.** Representative MS/MS spectra for non-standard genetic codes in *Babjeviella inositovora*. The identified peptide sequences are shown for three spectra, with matched y-ions in red and b-ions in blue. Amino acids translated from CUG are colored pink (serine) or yellow (alanine).

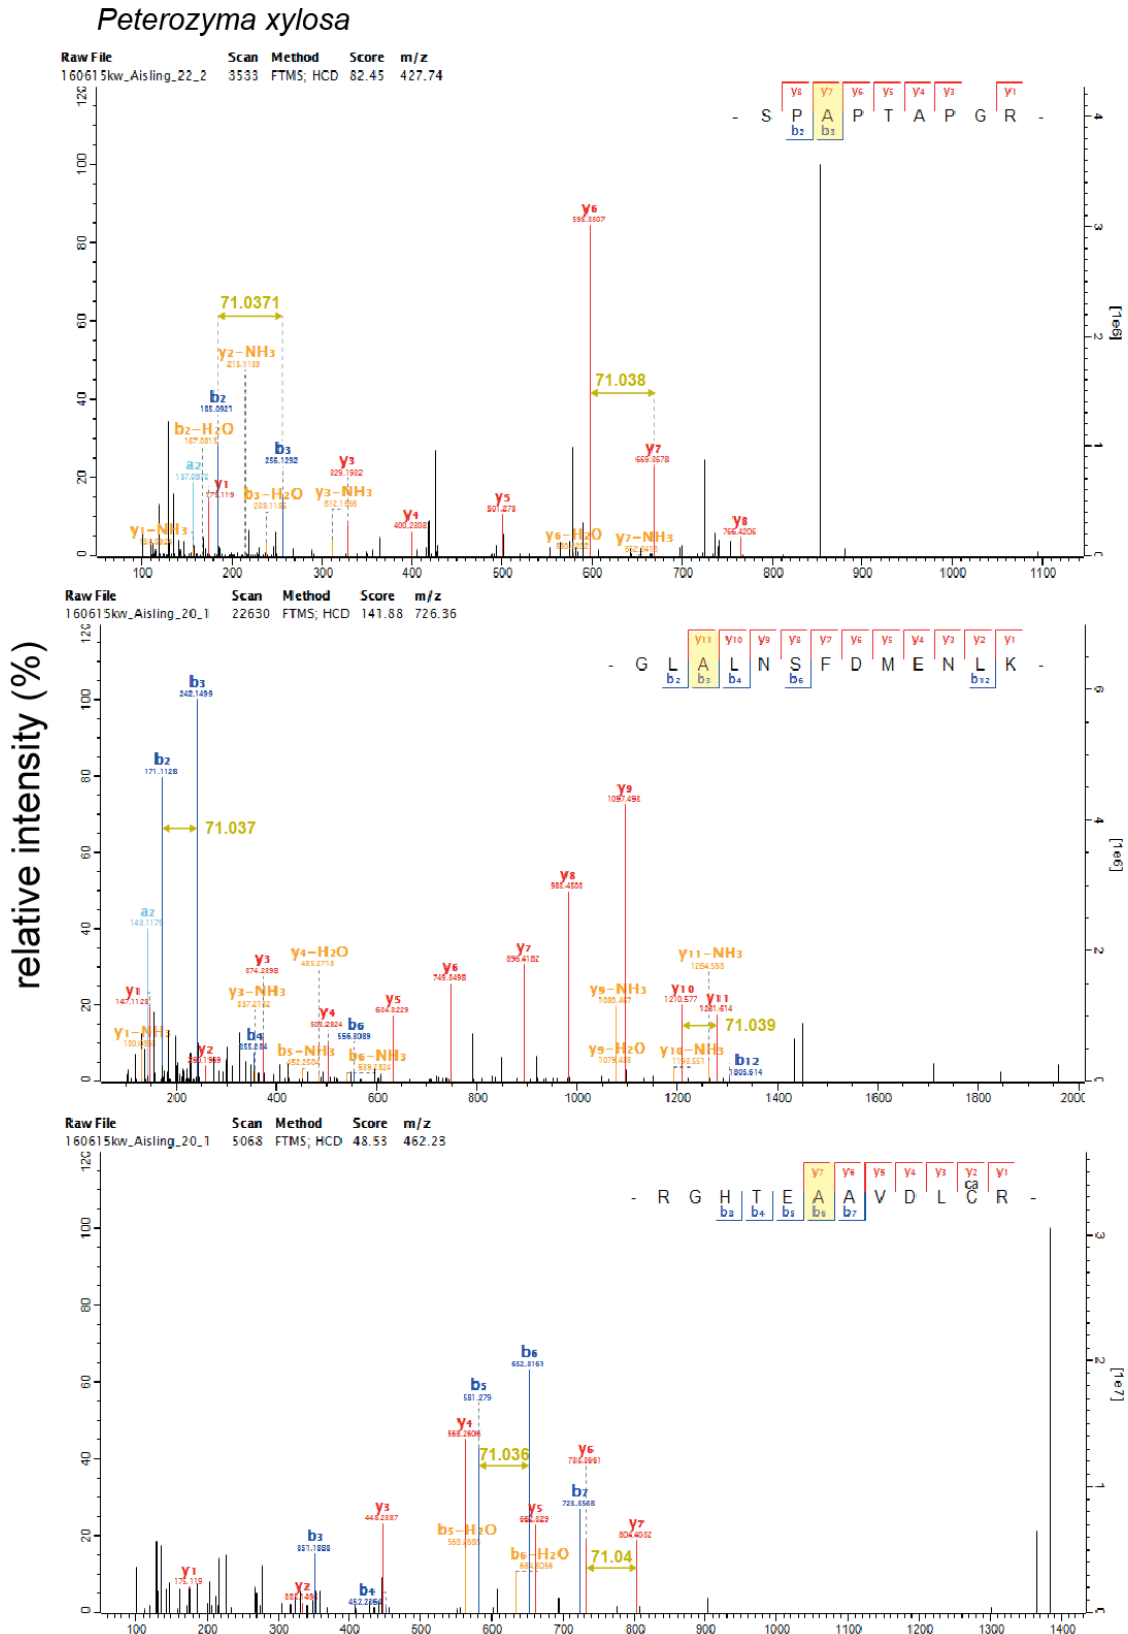

**Supplementary Fig. 3d.** Representative MS/MS spectra for non-standard genetic codes in *Peterozyma xylosa*. The identified peptide sequences are shown for three spectra, with matched y-ions in red and b-ions in blue. Amino acids translated from CUG are colored pink (serine) or yellow (alanine).

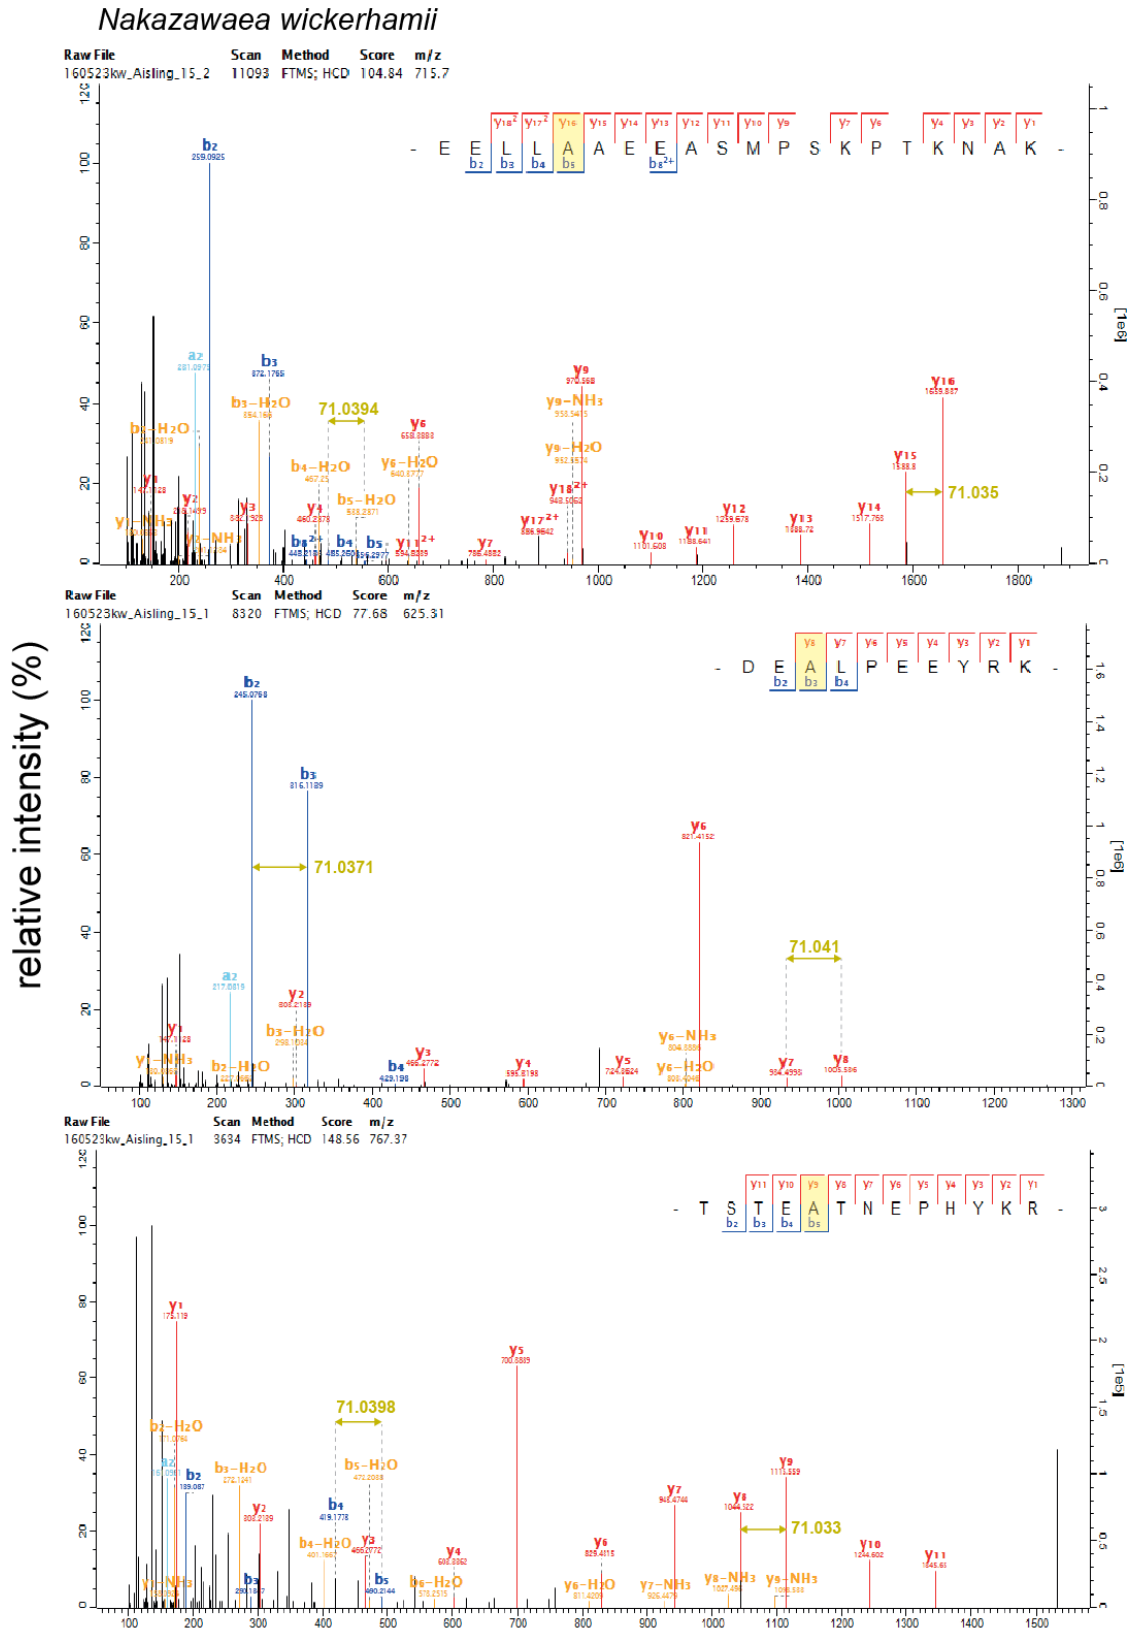

**Supplementary Fig. 3e.** Representative MS/MS spectra for non-standard genetic codes in *Nakazawaea wickerhamii*. The identified peptide sequences are shown for three spectra, with matched y-ions in red and b-ions in blue. Amino acids translated from CUG are colored pink (serine) or yellow (alanine).



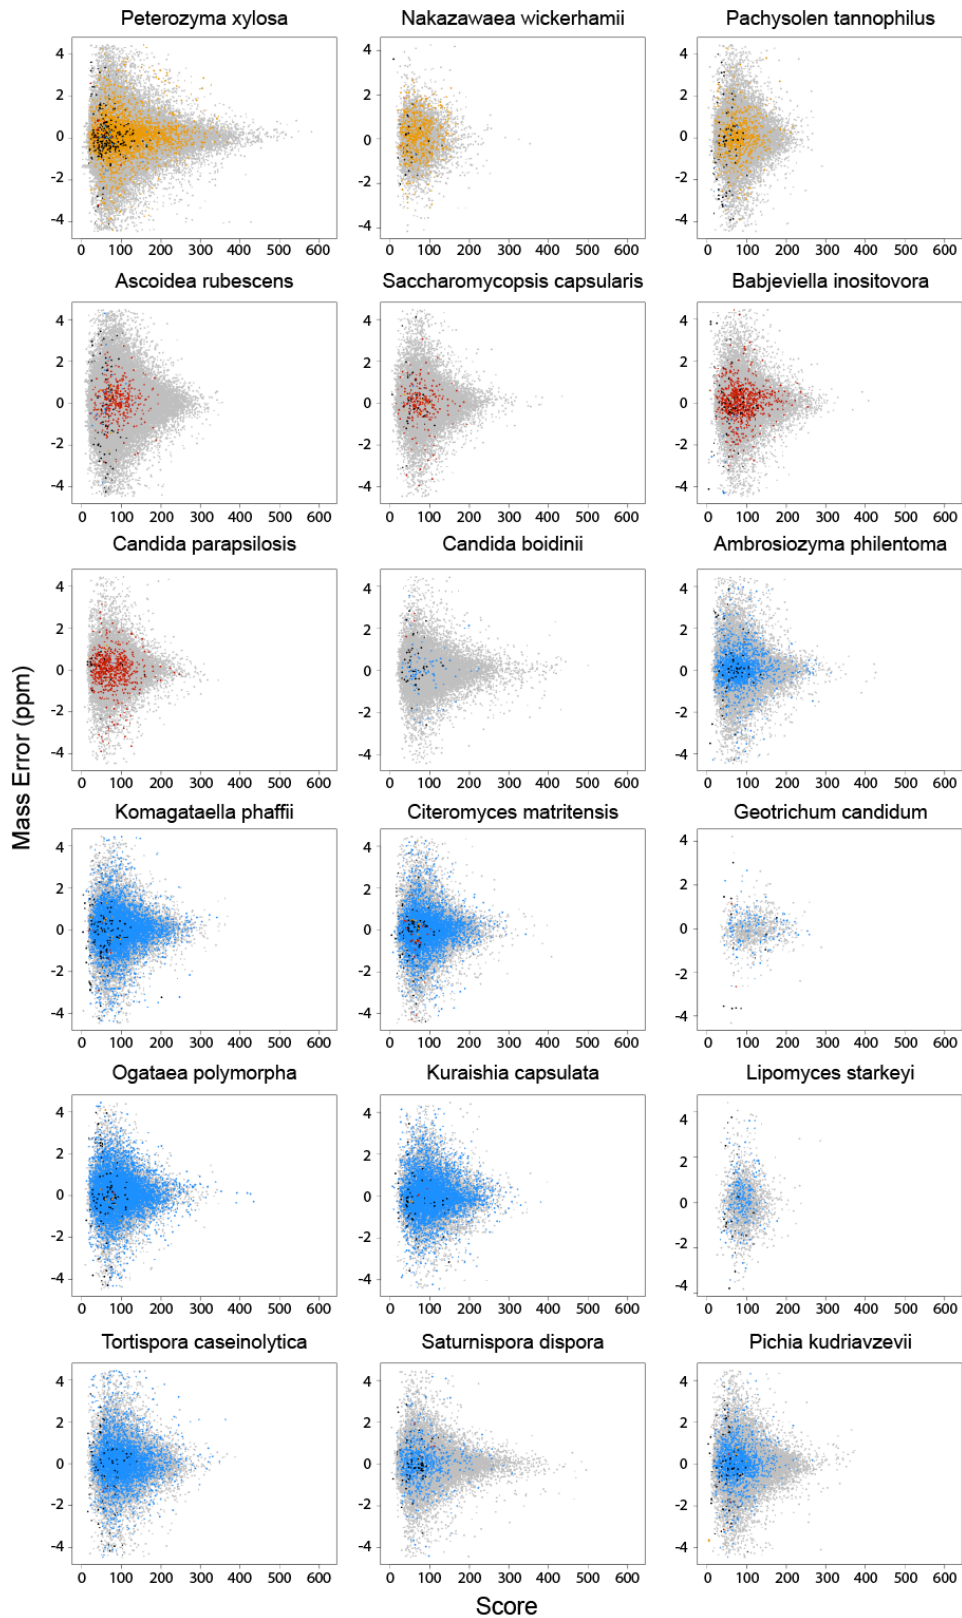

**Supplementary Fig. 4.** MaxQuant scatterplots showing calculated mass error (parts per million) versus score for all identified MS/MS spectra. All identified peptides not containing CUG-encoded amino acids are colored gray. Peptides containing CUG-translated amino acids are differentially colored: red, CUG-Ser; yellow, CUG-Ala; blue, CUG-Leu; black, CUG matching any amino acid other than Ser, Ala or Leu.

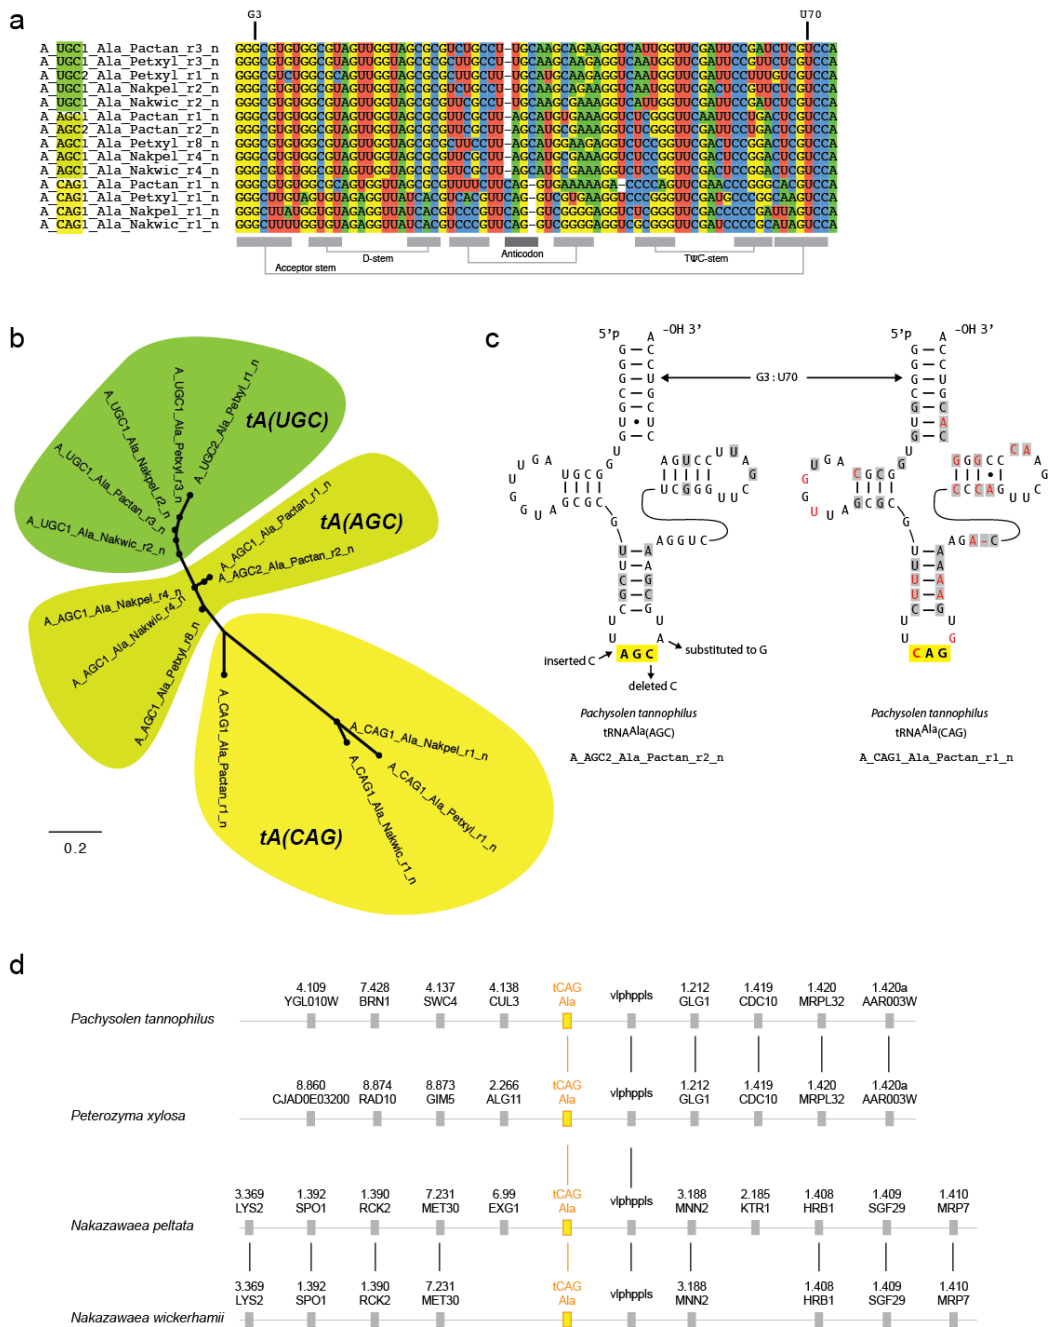

**Supplementary Fig. 5.** Origin of the  $tA^{CAG}$  gene in the Ala clade. **(a)** Alignment of all tRNA<sup>Ala</sup> sequences from species in the Ala clade. Sequences were aligned manually. **(b)** Unrooted phylogenetic tree constructed from the alignment by maximum likelihood. Some species contain multiple genes coding for identical tRNA sequences, as shown by ‘r2’, ‘r3’ (etc.) in the tRNA name to indicate the number of repeats. **(c)** Cloverleaf structures of *P. tannophilus* tRNA<sup>Ala</sup>(CAG) and one of its two types of tRNA<sup>Ala</sup>(AGC) molecules. Gray backgrounds indicate positions that vary among species of the Ala clade, for each tRNA. Red letters indicate positions that differ between the two sequences. The G<sub>3</sub>:U<sub>70</sub> basepair that is a hallmark of alanine tRNAs<sup>1</sup> is indicated. **(d)** Synteny relationship among the four Ala clade species at the  $tA^{CAG}$  locus. Genes are named according to their *S. cerevisiae* ortholog where possible, and numbers indicate their locations in the pre-WGD Ancestral genome reconstruction<sup>2</sup>. The name “viphppls” is used for a gene with no ortholog in baker’s yeast, which contains this amino acid sequence motif.



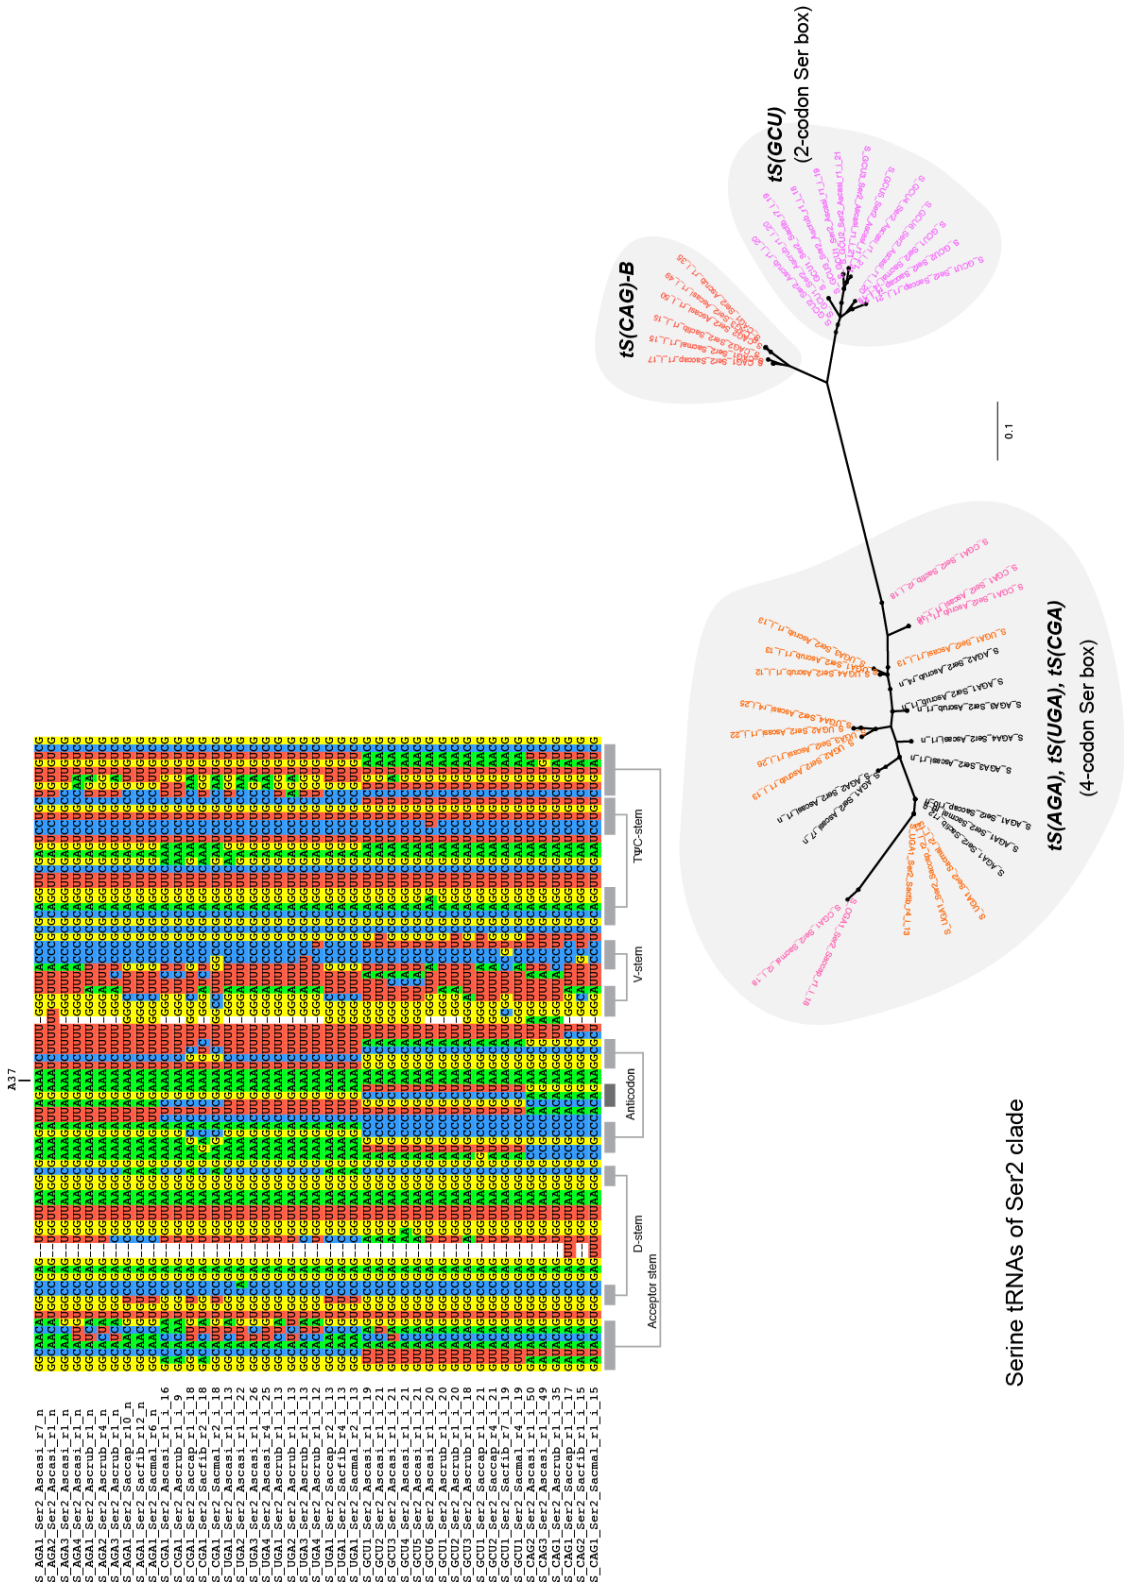

**Supplementary Fig. 7.** Origin of the  $tS^{CAG-B}$  gene of the Ser2 clade. A multiple alignment and a phylogenetic tree of all  $tRNA^{Ser}$  genes from Ser2 clade species are shown. The A<sub>37</sub> position that prevents low-level misacylation by LeuRS (ref. <sup>3</sup>) is marked.

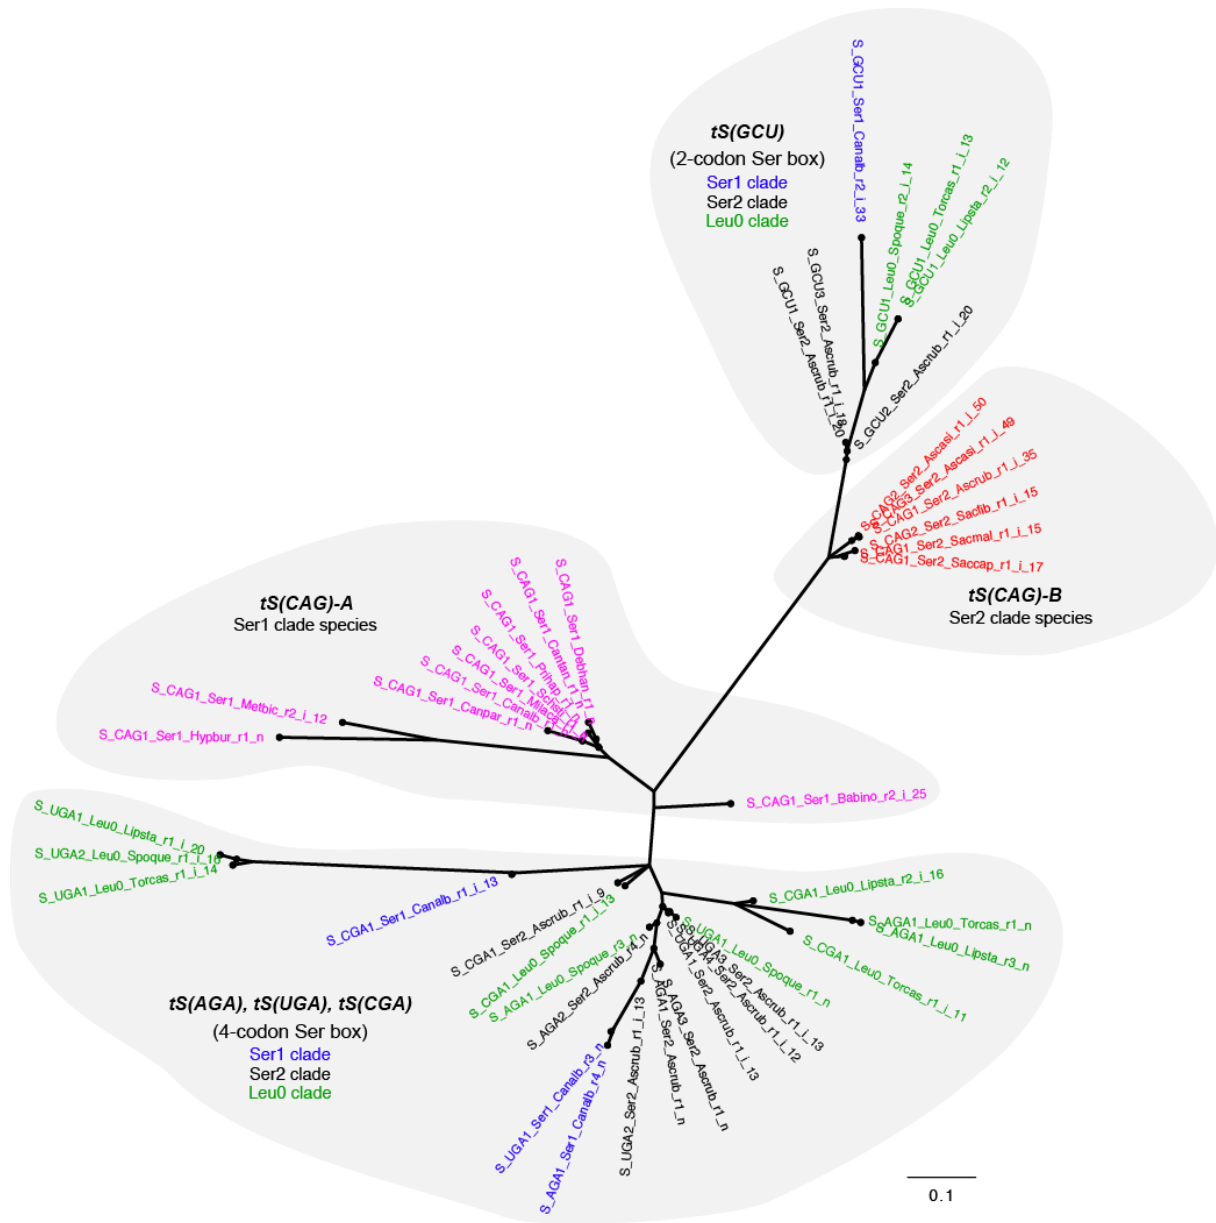

**Supplementary Fig. 8.** Relationship of  $tS^{CAG}-A$  from the Ser1 clade, and  $tS^{CAG}-B$  from the Ser2 clade, to  $tRNA^{Ser}$  genes from outgroup species. The outgroups are three species from the Leu0 group (in green), chosen because they have low levels of tRNA gene duplication: *Sporopachydermia quercuum*, *Tortispora caseinolytica*, and *Lipomyces starkeyi*. For reference, all  $tRNA^{Ser}$  genes from *Candida albicans* (Ser1 clade) and *Ascoidea rubescens* (Ser2 clade) are also included.

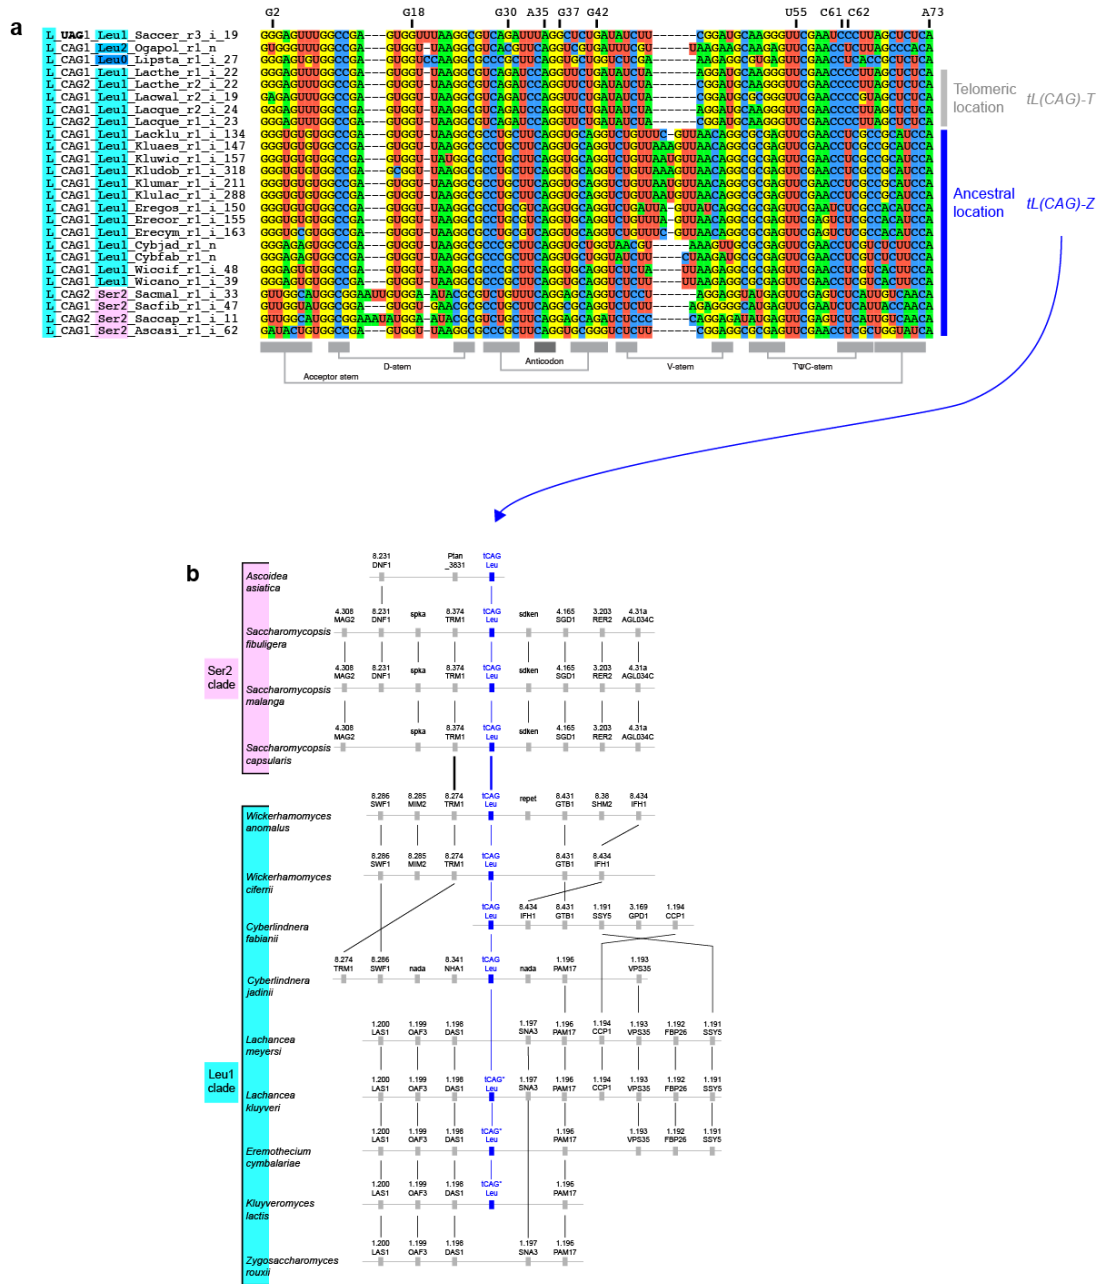

**Supplementary Fig. 9 (continues on next page).** Orthology of the  $tL^{CAG}$  genes of the Ser2 and Leu1 clades. **(a)** Alignment of the four  $tL^{CAG}$  genes identified in the Ser2 clade, with selected  $tL^{CAG}$  genes from Leu1, Leu0 and Leu2 clades. Sequences were aligned manually. Essential nucleotides in *S. cerevisiae* tRNA<sup>Leu</sup>(UAG) or other tRNA<sup>Leu</sup> molecules<sup>1,4</sup> are shown at the top. In particular, the G<sub>37</sub> and A<sub>73</sub> positions establish that the Ser2 clade genes code for a tRNA<sup>Leu</sup>. **(b)** Synteny relationships around  $tL^{CAG}$ -Z genes from Ser2 and Leu1 clades. Genes are named according to their *S. cerevisiae* ortholog where possible, and numbers indicate their locations in the pre-WGD Ancestral genome reconstruction<sup>2</sup>. Asterisks indicate  $tL^{CAG}$  genes with long introns.  $tL^{CAG}$  is linked to *TRM1*, which codes for a tRNA-modifying enzyme that makes N2,N2-dimethyl G<sub>26</sub> and helps tRNAs to fold<sup>5,6</sup>.

**c**

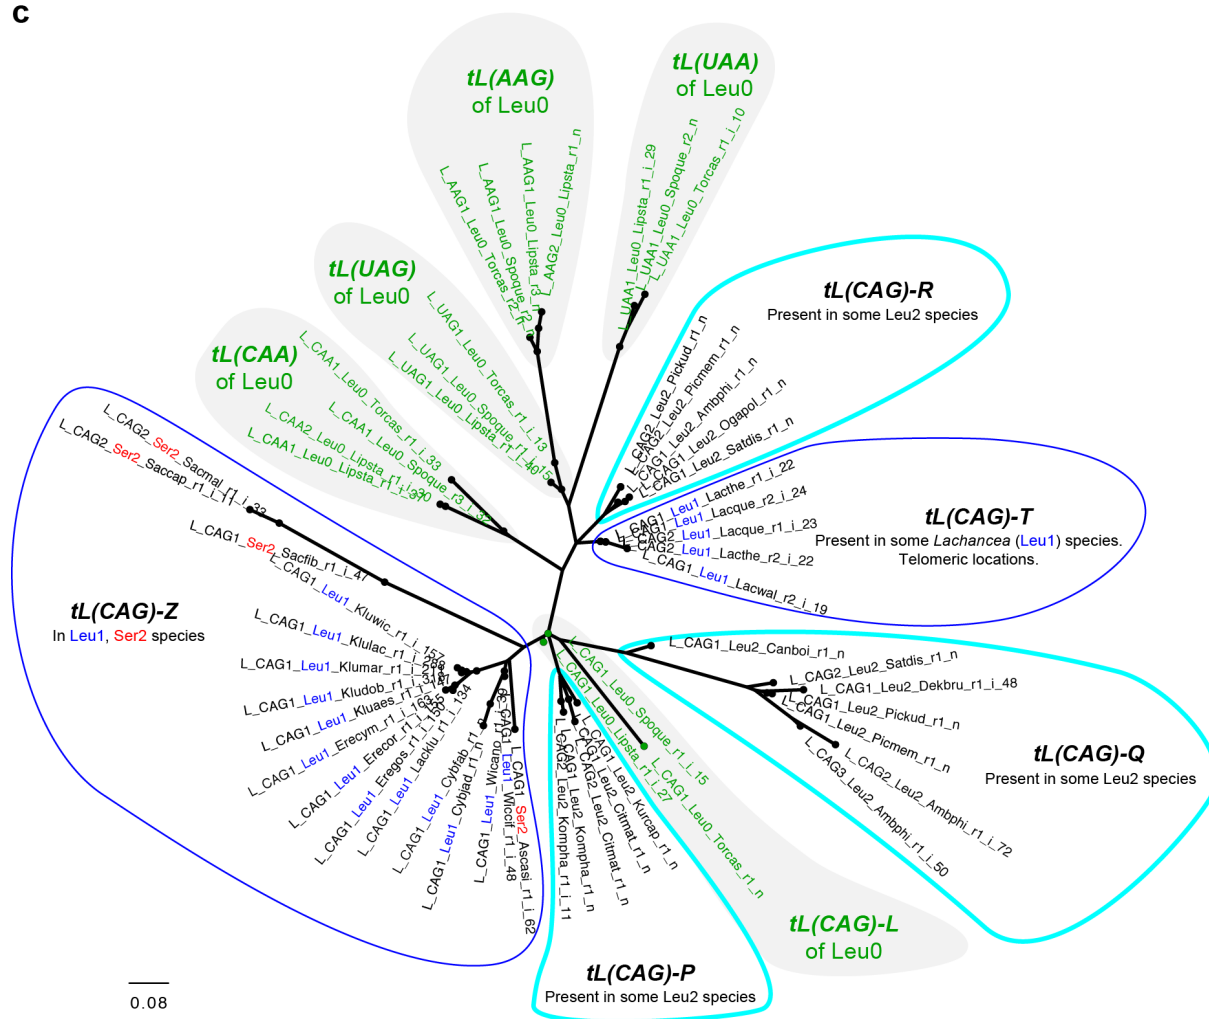

**Supplementary Fig. 9 (continued from previous page).** (c) Unrooted phylogenetic tree of  $tL^{CAG}$  genes from *Leu1*, *Leu2* and *Ser2* clades with, as outgroups, other  $tRNA^{Leu}$  isoacceptor genes from the *Leu0* species *Lipomyces starkeyi*, *Tortispora caseinolytica* and *Sporopachydermia quercuum*. Suffixes -Z, -P, -L, -Q, -T and -R denote different orthogroups of  $tL^{CAG}$ .

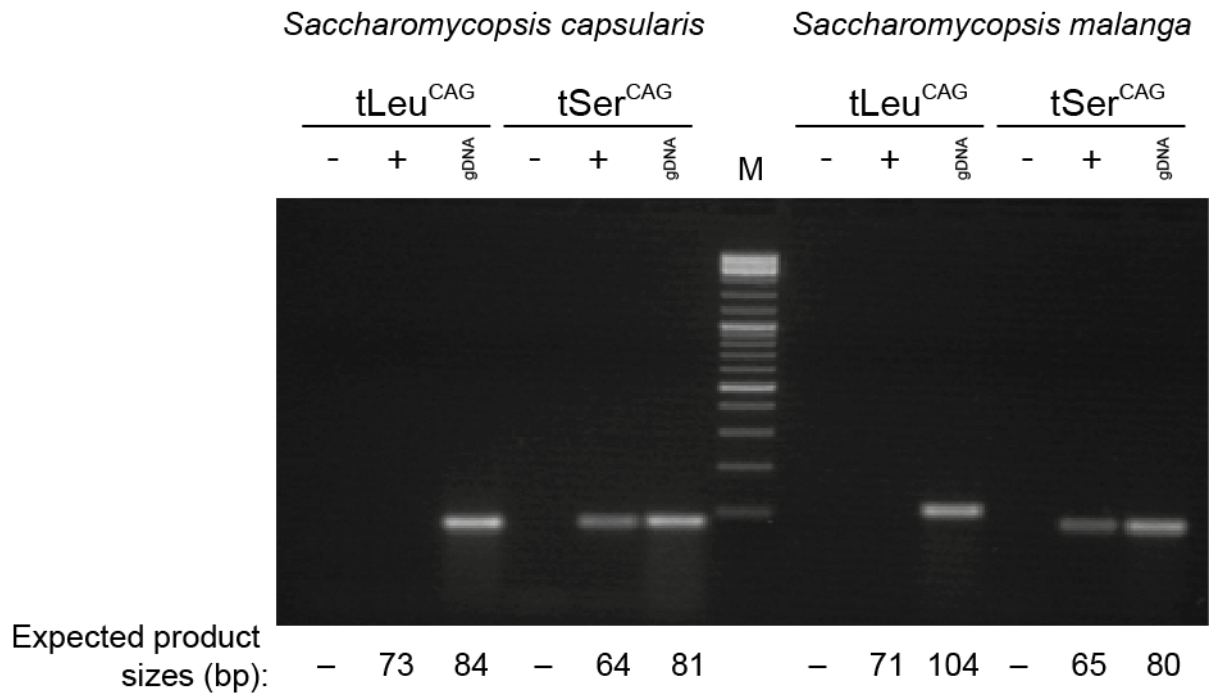

**Supplementary Fig. 10.** Analysis of expression of  $tS^{CAG}$  and  $tL^{CAG}$  in *Saccharomycopsis capsularis* and *S. malanga*. Primers specific for  $tS^{CAG}$  and  $tL^{CAG}$  in each species were used to amplify genomic DNA (gDNA) by PCR, and cDNA by RT-PCR in the presence (+) or absence (-) of reverse transcriptase. The smallest band in the molecular weight ladder (M) is 100 bp. Surprisingly, only 1 of 10  $tS^{CAG}$  cDNAs that we cloned and sequenced from *S. malanga* was spliced, and in *S. capsularis* none of 8 were spliced.



```

Saccharomycopsis_fibuligera aatcactaacctgtgcctcagatagcacaaaaccgaacagtagaattacagtgcagttt
Saccharomycopsis_capsularis cagcataaagacagc-----aaagcgcacgcaaaagatgcatagag----ccagataaaca
Saccharomycopsis_malanga cgtttttaagccc-----caagacaatgcga----tatctagga----ccgaaact-a
          **          * * * *          ***          *

Saccharomycopsis_fibuligera ccagccgctgcttgttacggcggctgct-----tgttacggccgccg-cttgtgacac
Saccharomycopsis_capsularis ccacatcctgattgaagacgggtaaccctg-tcatgcgcccttcccgttctgctac
Saccharomycopsis_malanga cgttacgcctattgttgagtgacgatgcgcggtgtcactttcaatgtgttgaccac
* * * ** * * * * * * * * * * ** **

Saccharomycopsis_fibuligera aaaaac---aca----cagt--gagagagctgcacactagcagacaaggtcaaaacttga
Saccharomycopsis_capsularis aacatgaacaagaggagagttcaagacgctcgaggacaagctatacagccaaagcttgt
Saccharomycopsis_malanga aacagctaaacaaggtcagaacaagctgaaaagaatagcacatgccaacaaggccttg
** * * * * * * * * * * * * * * * * * *

Saccharomycopsis_fibuligera taaacaa-----acctgaggaaaaacaagccaaacagcttatcaggagca
Saccharomycopsis_capsularis caaa-----aaaacgccacaaacccagaaacaaagga-agcatttaacaacagaaacaaa
Saccharomycopsis_malanga ctaacaagctatatgccttagaattcaaggcaaacccagaaataaaagtattcaagcagta
          **          * * * *          * * * *

Saccharomycopsis_fibuligera GTTGGTATGGCGGA---GTGGTGAACGCGCCTGCTTCAGGttaaagctgcttatacacct
Saccharomycopsis_capsularis GTTGGCATGGCGGAAATATGGAATACGCGTCTGCTTCAGGtctacaggaca-----
Saccharomycopsis_malanga GTTGGCATGGCGGAATGTGGAATACGCGTCTGTTTCAGGgcctaagggtggtttctacc
***** ***** ** ***** ** *****

Saccharomycopsis_fibuligera tcacttcagggtgagggcagcgtgatctCGCAGGTCTCTTAGAGGGGCATGAGTTCGAATC
Saccharomycopsis_capsularis -----AGCAGATCTCCCAGGAGATATGAGTTCGAGTC
Saccharomycopsis_malanga aatc-----aaaaggactAGCAGGTCTCT-AGGAGGTATGAGTTCGAGTC
          **** * * * * * * * * * *

Saccharomycopsis_fibuligera TCATTACCAACA ccttcttttttaatctttggtgttataatcagtgctttcctatatg
Saccharomycopsis_capsularis TCATTGTCAACA tgttctttttttaccagttgaagtactggtacttcttttcttag--
Saccharomycopsis_malanga TCATTGTCAACA cttttttttttatttttttaccaatctactgttaaatatgg--
***** ***** ** ***** * * *

Saccharomycopsis_fibuligera tcatatctccttttgctatgaacataggtttgacgccctcacaacagca--acaaacc
Saccharomycopsis_capsularis ---tagacctaattggcctgttt-----gctattcccagtttctaaaca--ggtactt
Saccharomycopsis_malanga ---taacaatctttaccattt-----ttatttctacactgaaggcatcgcatatt
          ** * * * *          **          **

Saccharomycopsis_fibuligera aat-atatTTTTTTTTcctt---ttatTTTTtccaaacgaaatTTTggatgacaaaaag
Saccharomycopsis_capsularis at--cgatgTTTtagcgttccaaacgggtgatgccaataacatctgcaaggtaaaatTTT
Saccharomycopsis_malanga ataacgattttctcgagattaagcgcgatc-----ttccatgccttcttt
* ** ** * * * * * * *

Saccharomycopsis_fibuligera taccaattaagac----gaagctgaaaatttgcttccatccactggcttaaatactttga
Saccharomycopsis_capsularis tgcaagtcgatctaccatagggtaaggtagccctggtttgccataatata-----
Saccharomycopsis_malanga agtccatcactct---gtacagtaaacactctgttgatccacatggaagctcacttt--
          * * * * * * * *

Saccharomycopsis_fibuligera ctatggctcaacttcagccact---gtatattgcaatatatcaacttcctcttttgg
Saccharomycopsis_capsularis -----tcaagccgaaatatttgataaacactctcagtaagaatcgtctgggtg
Saccharomycopsis_malanga ---taggccctttgggcaaatatttgagcatggcatt-----actatagctctggtt
          * * * * * * * * * *

```

**Supplementary Fig. 11.** Multiple sequence alignment of *tL<sup>CAG</sup>-Z* genes and their flanking regions from three *Saccharomycopsis* species. Grey highlighting shows the tRNA genes, with exons in uppercase. Sequence alignment was made by Clustal Omega with manual editing.

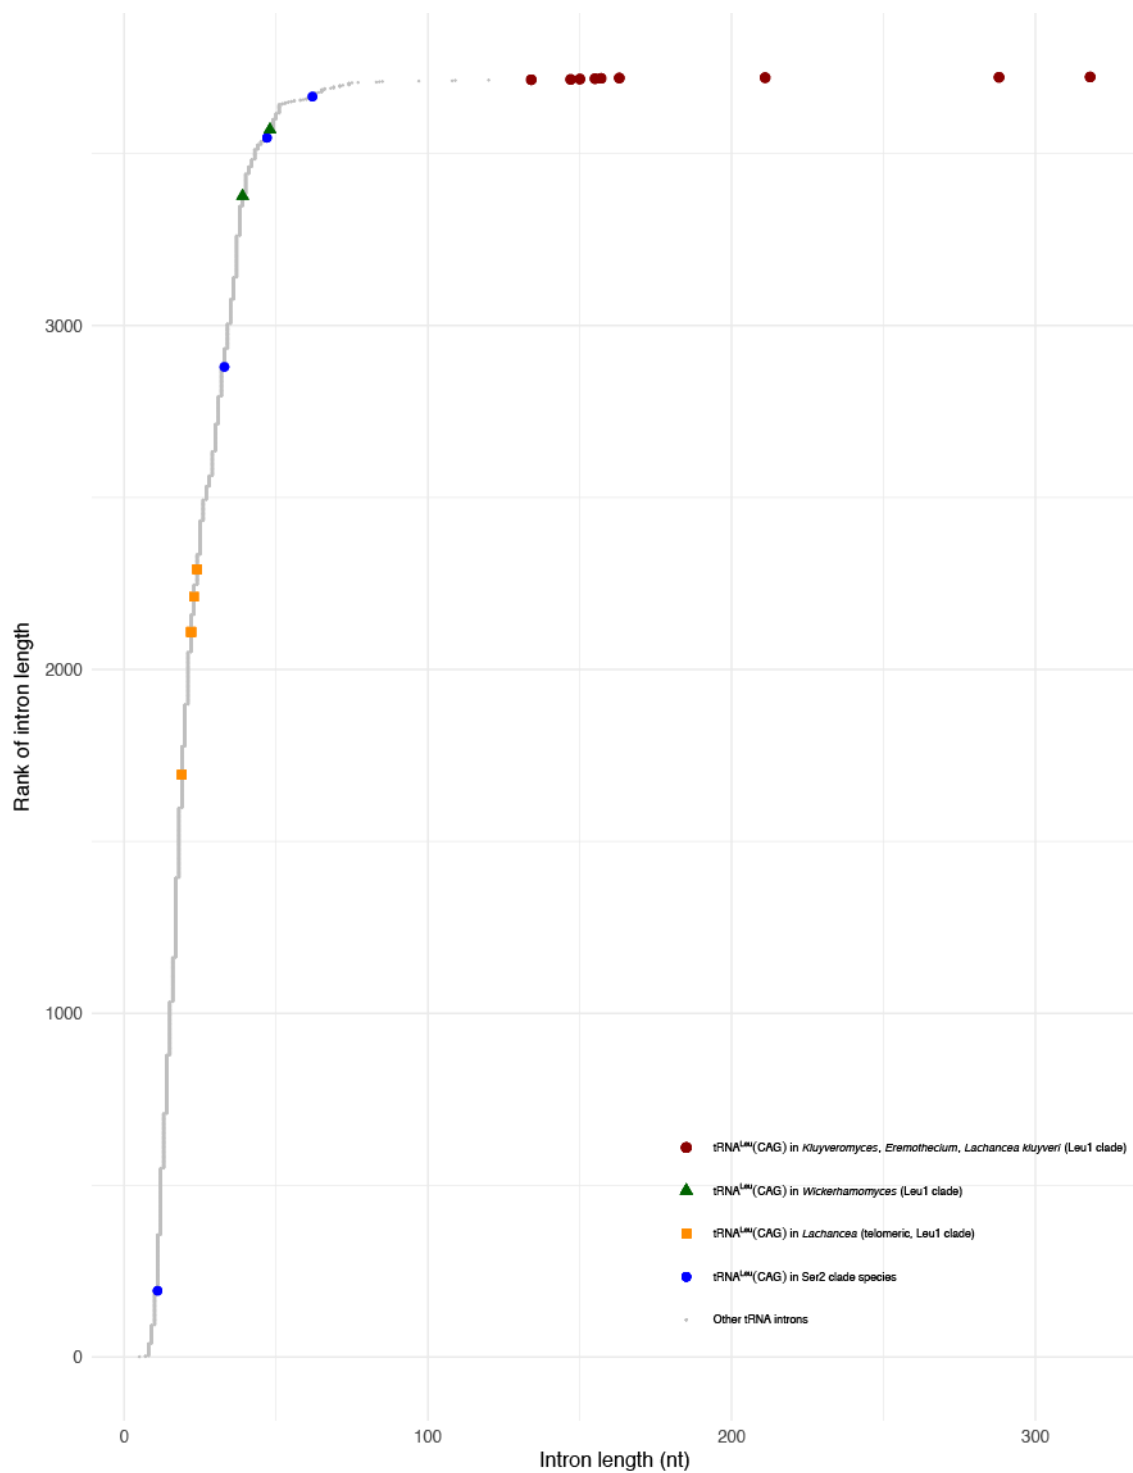

**Supplementary Fig. 12.** Cumulative distribution of intron lengths in budding yeast tRNA genes. The tRNA<sup>omes</sup> of 85 Saccharomycotina species were annotated using tRNAscan-SE and manual searches, resulting in 3,723 predicted tRNA introns which were then ranked by length. The lengths of introns in *tL<sup>CAG</sup>* in different clades are highlighted.

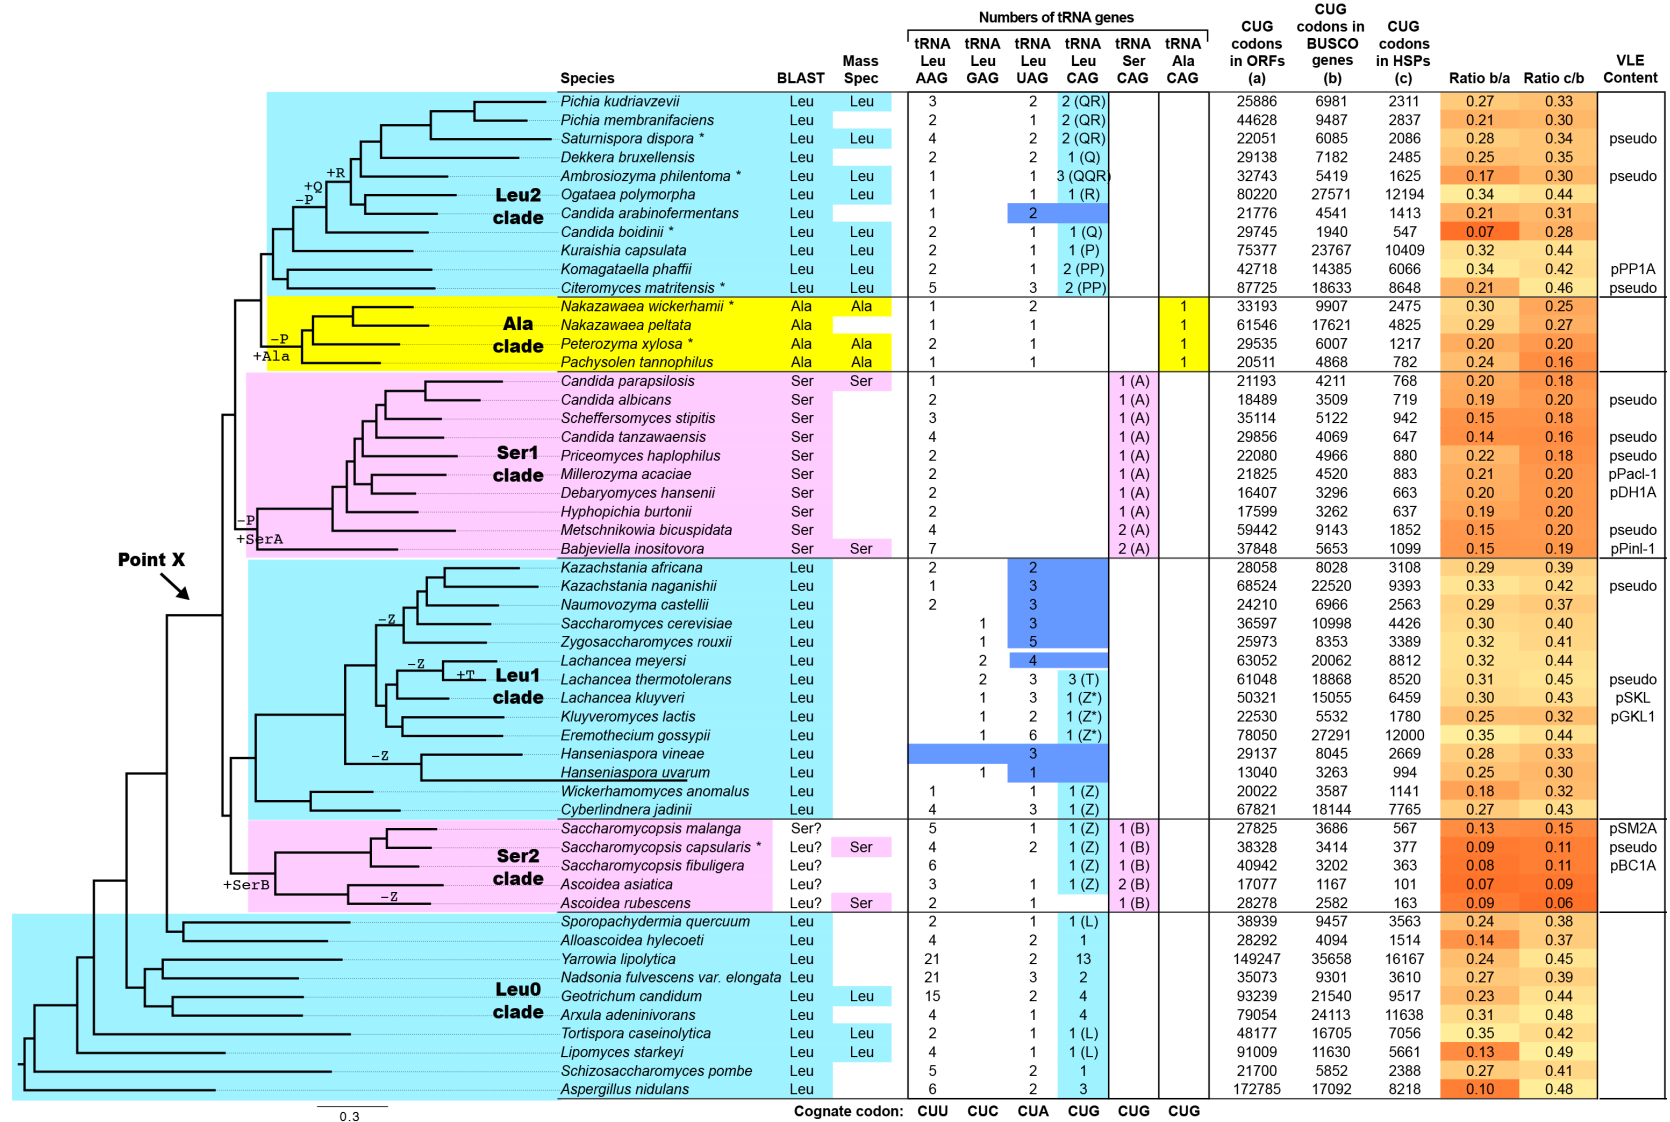

**Supplementary Fig. 13.** Details of tRNA gene content and CUG codon content in 52 yeast species. The number of tRNA genes in each genome is shown for tRNAs capable of reading CUN codons. Dark blue boxes indicate the wobbling predicted in the four groups of species that have no tRNA<sup>Leu</sup>(CAG) but translate CUG as Leu. For tRNA genes, letters in parentheses indicate membership of orthogroups (clades of orthologous tRNA genes), and + and – symbols on the tree show inferred points of gain or loss of orthogroups members. Columns a-c show the numbers of CUG codons present in all ORFs in the genome (a), in genes that have significant BLASTP hits to the BUSCO database<sup>7</sup> of conserved Ascomycota proteins (b), and in the regions of these genes that BLASTP aligned to BUSCO proteins (c). The ratios among these numbers are shown. Red shading indicates under-representation of CUG codons in conserved genes (low b/a ratio), and under-representation of CUG codons in conserved regions within genes (low c/b ratio). The VLE Content column shows species that harbor cytoplasmic linear DNA plasmids (named) similar to known killer plasmids, or whose genome contains pseudogene remnants of this type of plasmid (Supplementary Table 3). Other details are as in Figure 2.

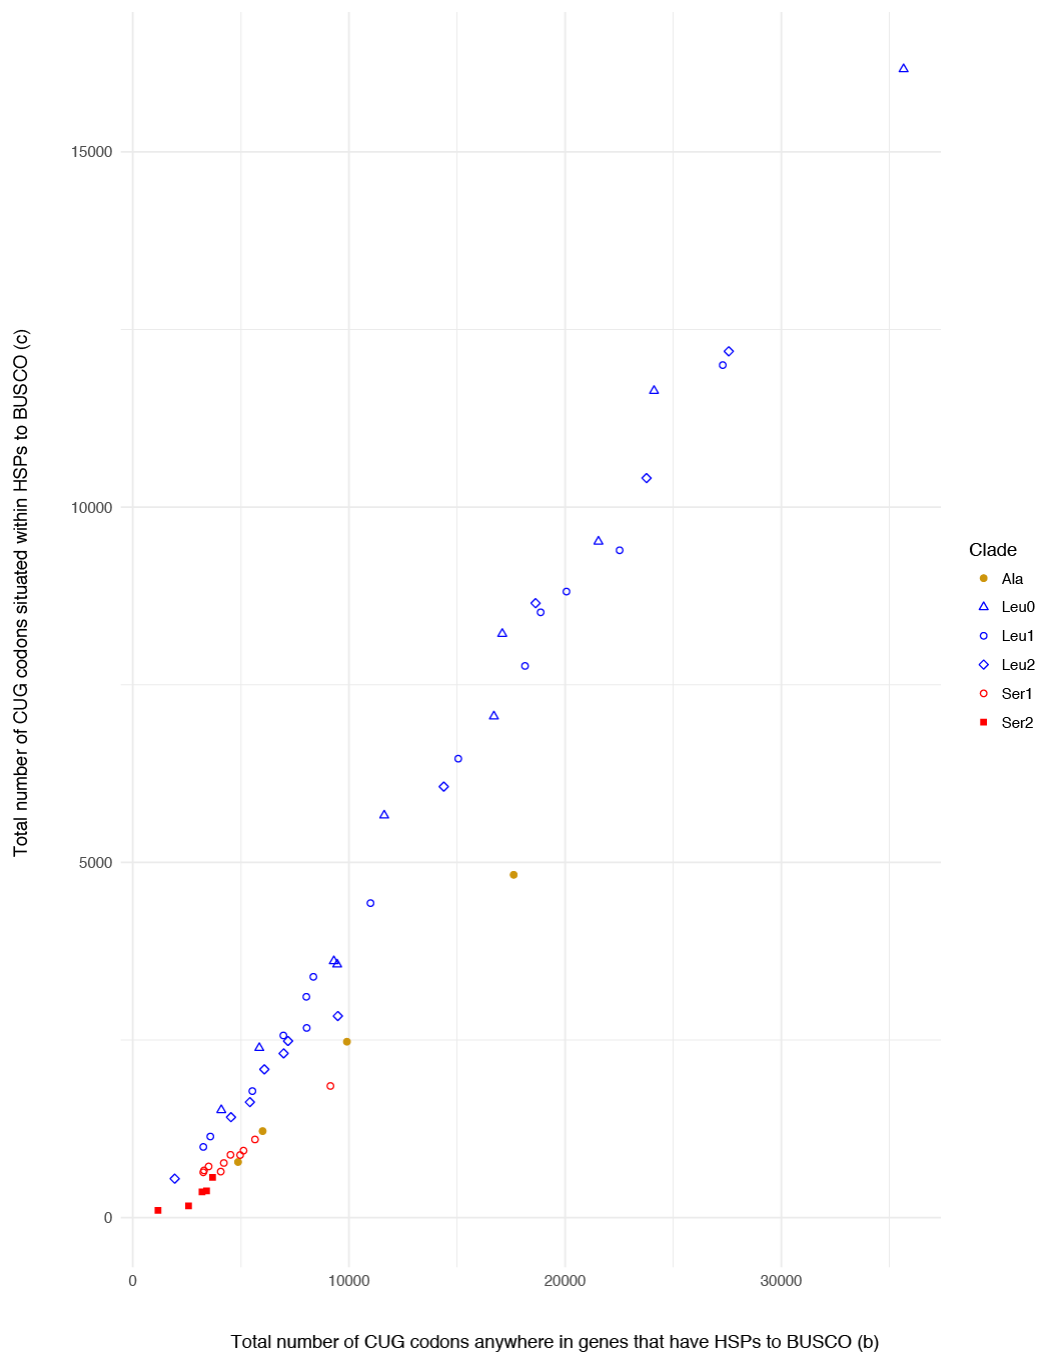

**Supplementary Fig. 14.** Scatterplot comparing, for yeast species in each clade, the numbers of CUG codons in conserved and non-conserved regions of genes. The predicted genes from each species were compared by BLASTP to the BUSCO database<sup>7</sup> of conserved Ascomycete proteins. For genes that had BLASTP hits with  $E < 1e-10$  to BUSCO, the numbers of CUG codons in the whole gene, and in the region of the gene that formed the BLAST HSP to the BUSCO gene, were calculated. These numbers were then summed for each species. Each point corresponds to one analyzed species, with symbols corresponding to clades. Species in the Ala, Ser1 and Ser2 clades are seen to have fewer CUG codons in total than in the Leu clades, and disproportionately fewer in conserved (HSP-forming) regions of genes. The X and Y axes correspond to columns b and c, respectively, of Supplementary Figure 13.

**Supplementary Table 1.** CUG site translations with b- and/or y-ion support in MaxQuant analysis of peptide mass fingerprinting data.

| Clade | Species                            | Amino acid corresponding to CUG site |      |     |   |   |   |   |   |   |   |   |   |   |   |   |     |   |   | Total number of CUG sites | Proportion <sup>a</sup> |       |
|-------|------------------------------------|--------------------------------------|------|-----|---|---|---|---|---|---|---|---|---|---|---|---|-----|---|---|---------------------------|-------------------------|-------|
|       |                                    | F                                    | L    | S   | Y | C | W | P | H | Q | R | M | T | N | K | V | A   | D | E |                           |                         | G     |
| Leu2  | <i>Ambrosiozyma philentoma</i>     | 0                                    | 426  | 0   | 0 | 0 | 0 | 1 | 0 | 0 | 0 | 1 | 0 | 0 | 0 | 0 | 0   | 0 | 0 | 1                         | 429                     | 0.993 |
| Leu2  | <i>Candida boidinii</i>            | 1                                    | 32   | 0   | 0 | 0 | 0 | 0 | 0 | 0 | 0 | 1 | 1 | 1 | 1 | 0 | 0   | 0 | 0 | 0                         | 37                      | 0.865 |
| Leu2  | <i>Citeromyces matritensis</i>     | 0                                    | 1547 | 2   | 1 | 0 | 1 | 2 | 0 | 0 | 0 | 2 | 0 | 0 | 1 | 0 | 1   | 0 | 0 | 0                         | 1557                    | 0.994 |
| Leu2  | <i>Komagataella phaffii</i>        | 0                                    | 1645 | 0   | 0 | 0 | 0 | 0 | 2 | 1 | 0 | 0 | 1 | 2 | 1 | 1 | 1   | 0 | 0 | 0                         | 1654                    | 0.995 |
| Leu2  | <i>Kuraishia capsulata</i>         | 0                                    | 1552 | 0   | 0 | 1 | 1 | 0 | 0 | 0 | 1 | 0 | 0 | 0 | 0 | 1 | 1   | 2 | 1 | 0                         | 1560                    | 0.995 |
| Leu2  | <i>Ogataea polymorpha</i>          | 1                                    | 2808 | 0   | 0 | 0 | 0 | 1 | 0 | 1 | 0 | 0 | 0 | 0 | 0 | 1 | 2   | 1 | 0 | 0                         | 2815                    | 0.998 |
| Leu2  | <i>Pichia kudriavzevii</i>         | 0                                    | 430  | 0   | 3 | 1 | 2 | 0 | 0 | 1 | 0 | 0 | 0 | 1 | 0 | 2 | 3   | 0 | 0 | 1                         | 444                     | 0.968 |
| Leu2  | <i>Saturnispora dispersa</i>       | 0                                    | 298  | 0   | 2 | 0 | 0 | 1 | 0 | 0 | 1 | 0 | 1 | 0 | 0 | 0 | 2   | 0 | 0 | 2                         | 307                     | 0.971 |
| Ala   | <i>Nakazawaea wickerhamii</i>      | 0                                    | 1    | 0   | 0 | 0 | 0 | 0 | 0 | 1 | 0 | 0 | 0 | 0 | 0 | 0 | 134 | 0 | 1 | 0                         | 137                     | 0.978 |
| Ala   | <i>Pachysolen tannophilus</i>      | 1                                    | 3    | 0   | 0 | 0 | 0 | 0 | 0 | 2 | 1 | 0 | 1 | 2 | 0 | 1 | 243 | 1 | 1 | 0                         | 256                     | 0.949 |
| Ala   | <i>Peterozyma xylosa</i>           | 1                                    | 4    | 3   | 0 | 2 | 1 | 1 | 1 | 1 | 0 | 2 | 3 | 1 | 0 | 0 | 472 | 0 | 1 | 4                         | 497                     | 0.950 |
| Ser1  | <i>Babjeviella inositovora</i>     | 0                                    | 2    | 242 | 0 | 0 | 0 | 0 | 0 | 2 | 0 | 0 | 0 | 0 | 0 | 0 | 0   | 1 | 0 | 0                         | 247                     | 0.980 |
| Ser1  | <i>Candida parapsilosis</i>        | 0                                    | 1    | 146 | 1 | 0 | 0 | 0 | 0 | 0 | 0 | 0 | 1 | 1 | 0 | 1 | 1   | 0 | 1 | 0                         | 153                     | 0.954 |
| Ser2  | <i>Ascoidea rubescens</i>          | 0                                    | 3    | 59  | 0 | 0 | 0 | 0 | 0 | 0 | 0 | 0 | 1 | 1 | 0 | 3 | 3   | 0 | 3 | 1                         | 74                      | 0.797 |
| Ser2  | <i>Saccharomycopsis capsularis</i> | 1                                    | 1    | 78  | 1 | 0 | 0 | 0 | 0 | 1 | 0 | 0 | 0 | 0 | 1 | 0 | 1   | 1 | 0 | 1                         | 86                      | 0.907 |
| Leu0  | <i>Geotrichum candidum</i>         | 0                                    | 59   | 0   | 0 | 0 | 0 | 0 | 0 | 0 | 0 | 1 | 0 | 0 | 0 | 1 | 0   | 0 | 0 | 0                         | 61                      | 0.967 |
| Leu0  | <i>Lipomyces starkeyi</i>          | 0                                    | 105  | 0   | 0 | 1 | 0 | 0 | 0 | 1 | 1 | 0 | 1 | 1 | 0 | 0 | 0   | 0 | 0 | 0                         | 110                     | 0.955 |
| Leu0  | <i>Tortispora caseinolytica</i>    | 1                                    | 1373 | 0   | 1 | 1 | 0 | 0 | 0 | 0 | 0 | 0 | 2 | 2 | 0 | 3 | 0   | 2 | 2 | 0                         | 1387                    | 0.990 |

Numbers in each cell refer to numbers of genomic CUG sites with a particular translation. Where multiple spectra were obtained that span the same genomic site, all spectra were required to agree regarding translation of the site.

<sup>a</sup>Proportion of CUG sites with the highlighted translation.

**Supplementary Table 2.** Summary of alternative topologies (some of which are partially resolved) associated with placements of the Ser1/2, Ala and Leu1/2 clades.

| <b>Data matrices</b>        | <b>Reference<br/>Topology<sup>a</sup></b> | <b>Topological Constraint Tested</b>  | <b>diff <math>\ln L^b</math></b> | <b>AU<sup>c</sup></b> | <b>SH<sup>d</sup></b> |
|-----------------------------|-------------------------------------------|---------------------------------------|----------------------------------|-----------------------|-----------------------|
| 54taxa_1237AA_unpartitioned | T1                                        | ((Leu1,Leu2),(Ser1,Ser2),Ala),others) | 39722.4                          | 3.00E-66*             | 0*                    |
|                             | T1                                        | ((Leu1,Leu2),others)                  | 36338.0                          | 7.00E-46*             | 0*                    |
|                             | T1                                        | ((Ser1,Ser2),others)                  | 6035.5                           | 1.00E-05*             | 0*                    |
| 54taxa_1237AA_partitioned   | T1                                        | ((Leu1,Leu2),(Ser1,Ser2),Ala),others) | 38889.6                          | 3.00E-72*             | 0*                    |
|                             | T1                                        | ((Leu1,Leu2),others)                  | 35685.2                          | 3.00E-41*             | 0*                    |
|                             | T1                                        | ((Ser1,Ser2),others)                  | 5884.3                           | 1.00E-06*             | 0*                    |

<sup>a</sup> T1 is the Maximum Likelihood tree.

<sup>b</sup> Log-likelihood difference between T1 and the best fully resolved topology that satisfies the topological constraint.

<sup>c</sup> Approximately Unbiased test<sup>8</sup>. Asterisks indicate significant support for the fully resolved topology over the alternative topology (*i.e.*, for rejecting the alternative topology as an equally likely explanation of the data).

<sup>d</sup> Shimodaira-Hasegawa test<sup>9</sup>. Asterisks indicate significant support for the fully resolved topology over the alternative topology (*i.e.*, for rejecting the alternative topology as an equally likely explanation of the data).

**Supplementary Table 3.** Virus-Like Elements (VLEs) and their pseudogenes.

(A) Known cytoplasmic linear DNA killer plasmids and accessory plasmids, including unsequenced ones (from Fukuhara<sup>10</sup>).

| Plasmid name  | Host species                         | Clade | NCBI accession number        | Synonym                            |
|---------------|--------------------------------------|-------|------------------------------|------------------------------------|
| pGKL1, 2      | <i>Kluyveromyces lactis</i>          | Leu1  | X01095.1                     |                                    |
| pSKL          | <i>Lachancea kluyveri</i>            | Leu1  | X54850.1                     | <i>Saccharomyces kluyveri</i>      |
| pPP1A, pPP1B  | <i>Komagataella phaffii</i>          | Leu2  | A.Y.C. & K.H.W., unpublished | <i>Pichia pastoris</i>             |
| pPH1          | <i>Pichia heedi</i>                  | Leu2  | Not sequenced                |                                    |
| pPK1          | <i>Pichia kluyveri</i>               | Leu2  | Not sequenced                |                                    |
| pPinl-1, 2, 3 | <i>Babjeviella inositovora</i>       | Ser1  | AJ564102.1                   | <i>Pichia inositovora</i>          |
| pDH1A         | <i>Debaryomyces hansenii</i>         | Ser1  | JN624283.1                   |                                    |
| pDP1          | <i>Debaryomyces polymorphus</i>      | Ser1  | Not sequenced                |                                    |
| pWR1A         | <i>Debaryomyces robertsiae</i>       | Ser1  | AJ617332.1                   |                                    |
| pPacl-1, 2    | <i>Millerozyma acaciae</i>           | Ser1  | AM180622.1                   | <i>Pichia acaciae</i>              |
| pPE1B         | <i>Schwanniomyces etchellsii</i>     | Ser1  | AJ278986.2                   | <i>Pichia etchellsii</i>           |
| pScr1-1, 2, 3 | <i>Saccharomycopsis crataegensis</i> | Ser2  | Not sequenced                |                                    |
| pBC1A, B      | <i>Saccharomycopsis fibuligera</i>   | Ser2  | Not sequenced                | <i>Botryosascus cladosporoides</i> |
| pSM2A         | <i>Saccharomycopsis malanga</i>      | Ser2  | Not sequenced                |                                    |

## (B) Genomic pseudogenes of cytoplasmic linear DNA plasmids.

| Query plasmid name | Host species of query plasmid  | Query plasmid protein | Type of protein from query plasmid | Subject species                    | Clade of subject species | Subject accession number / chromosome / contig / scaffold | Subject location (bp position) | TBLASTN E-value |
|--------------------|--------------------------------|-----------------------|------------------------------------|------------------------------------|--------------------------|-----------------------------------------------------------|--------------------------------|-----------------|
| pGKL2              | <i>Kluyveromyces lactis</i>    | ORF9                  | Other                              | <i>Kazachstania africana</i>       | Leu1                     | NC_018946.1                                               | 159865..159716                 | 4E-11           |
| pGKL1              | <i>Kluyveromyces lactis</i>    | URFP1                 | DNA polymerase                     | <i>Kluyveromyces lactis</i>        | Leu1                     | NC_006042.1 (chromosome F)                                | 2602192..2601947               | 9E-40           |
| pGKL1              | <i>Kluyveromyces lactis</i>    | URFP4                 | Other                              | <i>Kluyveromyces lactis</i>        | Leu1                     | NC_006040.1 (chromosome D)                                | 1519466..1519323               | 3E-140          |
| pGKL1              | <i>Kluyveromyces lactis</i>    | URFP2                 | Chitin-binding protein             | <i>Lachancea meyersii</i>          | Leu1                     | FJUM01000015.1                                            | 87694..90096                   | 0E+00           |
| pSKL               | <i>Lachancea kluyveri</i>      | ORF2                  | DNA polymerase                     | <i>Lachancea meyersii</i>          | Leu1                     | FJUM01000002.1                                            | 785282..785626                 | 8E-21           |
| pSKL               | <i>Lachancea kluyveri</i>      | ORF1                  | Other                              | <i>Lachancea meyersii</i>          | Leu1                     | FJUM01000002.1                                            | 786058..785843                 | 3E-12           |
| pPP1A              | <i>Komagataella phaffii</i>    | ORF2                  | DNA polymerase                     | <i>Ambrosiozyma philentoma</i>     | Leu2                     | NHAR0000000, NODE_29                                      | 155848..156321                 | 8E-30           |
| pWR1A              | <i>Debaryomyces robertsiae</i> | ORF1                  | Other                              | <i>Ambrosiozyma philentoma</i>     | Leu2                     | NHAR0000000, NODE_39                                      | 48746..47553                   | 2E-17           |
| pPinl-3            | <i>Babjeviella inositovora</i> | ORF2                  | DNA polymerase                     | <i>Citeromyces matritensis</i>     | Leu2                     | NHAP00000000, scf7180000043097                            | 21318..20980                   | 1E-12           |
| pSKL               | <i>Lachancea kluyveri</i>      | ORF1                  | Other                              | <i>Citeromyces matritensis</i>     | Leu2                     | NHAP00000000, scf7180000043097                            | 20231..19881                   | 2E-27           |
| pPP1A              | <i>Komagataella phaffii</i>    | ORF1                  | Chitin-binding protein             | <i>Saturnispora dispersa</i>       | Leu2                     | NHAL00000000, NODE_2                                      | 285627..284350                 | 9E-101          |
| pPacl-2            | <i>Millerozyma acaciae</i>     | ORF1                  | Chitin-binding protein             | <i>Babjeviella inositovora</i>     | Ser1                     | scaffold_37                                               | 33..596                        | 3E-75           |
| pPP1A              | <i>Komagataella phaffii</i>    | ORF2                  | DNA polymerase                     | <i>Babjeviella inositovora</i>     | Ser1                     | scaffold_38                                               | 1131..1                        | 3E-166          |
| pPP1A              | <i>Komagataella phaffii</i>    | ORF1                  | Chitin-binding protein             | <i>Candida albicans</i>            | Ser1                     | CP017623.1                                                | 2964425..2965813               | 2E-143          |
| pPacl-1            | <i>Millerozyma acaciae</i>     | ORF2                  | DNA polymerase                     | <i>Candida tanzawaensis</i>        | Ser1                     | scaffold_4                                                | 468162..468512                 | 8E-19           |
| pPacl-2            | <i>Millerozyma acaciae</i>     | ORF1                  | Chitin-binding protein             | <i>Debaryomyces hansenii</i>       | Ser1                     | NC_006048.2 (chromosome F)                                | 1415591..1416967               | 2E-163          |
| pSKL               | <i>Lachancea kluyveri</i>      | ORF2                  | DNA polymerase                     | <i>Debaryomyces hansenii</i>       | Ser1                     | NC_006044.2 (chromosome B)                                | 1006802..1006921               | 1E-06           |
| pWR1A              | <i>Debaryomyces robertsiae</i> | ORF5                  | Other                              | <i>Debaryomyces hansenii</i>       | Ser1                     | NC_006049.2 (chromosome G)                                | 1355356..1354841               | 3E-61           |
| pPacl-1            | <i>Millerozyma acaciae</i>     | ORF2                  | DNA polymerase                     | <i>Metschnikowia bicuspidata</i>   | Ser1                     | scaffold_2                                                | 1597435..1598079               | 1E-26           |
| pWR1A              | <i>Debaryomyces robertsiae</i> | ORF5                  | Other                              | <i>Millerozyma acaciae</i>         | Ser1                     | BCKO01000006                                              | 316012..316401                 | 2E-09           |
| pPacl-2            | <i>Millerozyma acaciae</i>     | ORF1                  | Chitin-binding protein             | <i>Priceomyces haplophilus</i>     | Ser1                     | BCIF01000001 (scaffold 0)                                 | 779320..777917                 | 6E-115          |
| pPacl-2            | <i>Millerozyma acaciae</i>     | ORF1                  | Chitin-binding protein             | <i>Saccharomycopsis capsularis</i> | Ser2                     | NHAM00000000, flattened_line_108                          | 63884..63495                   | 8E-34           |
| pPP1A              | <i>Komagataella phaffii</i>    | ORF2                  | DNA polymerase                     | <i>Saccharomycopsis capsularis</i> | Ser2                     | NHAM00000000, flattened_line_98                           | 35473..34415                   | 1E-73           |
| pPE1B              | <i>Pichia etchellsii</i>       | ORF4                  | Other                              | <i>Saccharomycopsis capsularis</i> | Ser2                     | NHAM00000000, flattened_line_88                           | 33220..33369                   | 9E-11           |
| pSKL               | <i>Lachancea kluyveri</i>      | ORF6                  | RNA polymerase                     | <i>Saccharomycopsis capsularis</i> | Ser2                     | NHAM00000000, flattened_line_169                          | 13928..14230                   | 3E-23           |
| pPinl-3            | <i>Babjeviella inositovora</i> | ORF3                  | Chitin-binding protein             | <i>Saccharomycopsis fibuligera</i> | Ser2                     | CP012825.1                                                | 2633570..2632500               | 8E-42           |
| pPinl-3            | <i>Babjeviella inositovora</i> | ORF3                  | Chitin-binding protein             | <i>Saccharomycopsis malanga</i>    | Ser2                     | BCGJ01000007.1                                            | 158965..157898                 | 4E-34           |
| pPinl-3            | <i>Babjeviella inositovora</i> | ORF2                  | DNA polymerase                     | <i>Saccharomycopsis malanga</i>    | Ser2                     | BCGJ01000005.1                                            | 1620614..1620456               | 1E-17           |
| pGKL2              | <i>Kluyveromyces lactis</i>    | ORF3                  | Other                              | <i>Saccharomycopsis malanga</i>    | Ser2                     | BCGJ01000001.1                                            | 2557807..2557661               | 1E-23           |
| pPE1B              | <i>Pichia etchellsii</i>       | ORF6                  | RNA polymerase                     | <i>Saccharomycopsis malanga</i>    | Ser2                     | BCGJ01000005.1                                            | 352248..352051                 | 2E-05           |



**Supplementary Table 4.** Details of LC-MS/MS experiments.

| Clade | Species                            | MS scans | MSMS scans | PEAKS peptides | Unique PEAKS peptides | Predicted ORFs hit by PEAKS peptides | CUG codons spanned by PEAKS peptides | MaxQuant peptides @ 1% FDR | Unique MaxQuant peptides | MaxQuant peptides that span a CUG codon with b- or y- ion support |
|-------|------------------------------------|----------|------------|----------------|-----------------------|--------------------------------------|--------------------------------------|----------------------------|--------------------------|-------------------------------------------------------------------|
| Leu2  | <i>Ambrosiozyma philentoma</i>     | 11912    | 74175      | 55210          | 35214                 | 2091                                 | 270                                  | 40836                      | 14168                    | 689                                                               |
| Leu2  | <i>Candida boidinii</i>            | 19324    | 99827      | 44145          | 29379                 | 1749                                 | 17                                   | 24085                      | 8485                     | 68                                                                |
| Leu2  | <i>Citeromyces matritensis</i>     | 12218    | 75616      | 59406          | 34268                 | 1786                                 | 1062                                 | 41739                      | 13335                    | 2070                                                              |
| Leu2  | <i>Komagataella phaffii</i>        | 12173    | 75290      | 60348          | 34407                 | 1953                                 | 1115                                 | 44153                      | 13409                    | 2295                                                              |
| Leu2  | <i>Kuraishia capsulata</i>         | 13047    | 52908      | 42944          | 24706                 | 1253                                 | 1094                                 | 25322                      | 7327                     | 1827                                                              |
| Leu2  | <i>Ogataea polymorpha</i>          | 12239    | 74733      | 58587          | 33006                 | 1811                                 | 1891                                 | 36139                      | 10933                    | 3280                                                              |
| Leu2  | <i>Pichia kudriavzevii</i>         | 12060    | 73206      | 57082          | 32560                 | 1780                                 | 250                                  | 39963                      | 11354                    | 604                                                               |
| Leu2  | <i>Saturnispora dispersa</i>       | 19769    | 103565     | 45263          | 28796                 | 1585                                 | 176                                  | 28120                      | 9091                     | 433                                                               |
| Ala   | <i>Nakazawaea wickerhamii</i>      | 9861     | 52454      | 22041          | 16503                 | 709                                  | 103                                  | 7434                       | 2514                     | 285                                                               |
| Ala   | <i>Pachysolen tannophilus</i>      | 12992    | 67984      | 48944          | 35717                 | 2017                                 | 160                                  | 29750                      | 12050                    | 428                                                               |
| Ala   | <i>Peterozyma xylosa</i>           | 42399    | 242197     | 160561         | 66028                 | 2841                                 | 372                                  | 115265                     | 17477                    | 764                                                               |
| Ser1  | <i>Babjeviella inositovora</i>     | 11963    | 71485      | 57868          | 33334                 | 2072                                 | 173                                  | 35753                      | 12475                    | 387                                                               |
| Ser1  | <i>Candida parapsilosis</i>        | 11413    | 63163      | 44874          | 28019                 | 1719                                 | 89                                   | 34966                      | 11380                    | 290                                                               |
| Ser2  | <i>Ascoidea rubescens</i>          | 46787    | 228199     | 124267         | 38246                 | 2154                                 | 43                                   | 111051                     | 16785                    | 124                                                               |
| Ser2  | <i>Saccharomycopsis capsularis</i> | 12134    | 75547      | 59067          | 37016                 | 2027                                 | 57                                   | 39849                      | 14354                    | 158                                                               |
| Leu0  | <i>Geotrichum candidum</i>         | 10845    | 37457      | 27453          | 15587                 | 923                                  | 217                                  | 1224                       | 528                      | 80                                                                |
| Leu0  | <i>Lipomyces starkeyi</i>          | 11724    | 67058      | 48705          | 29526                 | 1237                                 | 141                                  | 2527                       | 1134                     | 146                                                               |
| Leu0  | <i>Tortispora caseinolytica</i>    | 12818    | 51440      | 42006          | 24609                 | 1407                                 | 918                                  | 28532                      | 9377                     | 1586                                                              |

**Supplementary Table 5.** Monoisotopic residue masses of amino acids, and the allowable mass ranges used for b/y ion fragment determination.

| <b>Amino Acid</b>              | <b>Monoisotopic residue mass (Da)</b> | <b>Accepted mass range</b> |
|--------------------------------|---------------------------------------|----------------------------|
| Glycine                        | 57.02147                              | 56.96 - 57.08              |
| Alanine                        | 71.03712                              | 70.977 - 71.097            |
| Serine                         | 87.03203                              | 86.97 - 87.09              |
| Proline                        | 97.05277                              | 96.99 - 97.11              |
| Valine                         | 99.06842                              | 99.0 - 99.128              |
| Threonine                      | 101.04768                             | 100.98 - 101.1             |
| Cysteine                       | 103.00919                             | 102.9491 - 103.0691        |
| Leucine                        | 113.08407                             | 113.00407 - 113.16407      |
| Asparagine                     | 114.04293                             | 113.982 - 114.102          |
| Aspartic acid                  | 115.02695                             | 114.966 - 115.086          |
| Glutamine                      | 128.05858                             | 127.99858 - 128.0767       |
| Lysine                         | 128.09497                             | 128.0768 - 128.15497       |
| Glutamic Acid                  | 129.0426                              | 128.9826 - 129.1026        |
| Methionine                     | 131.04049                             | 130.98 - 131.1             |
| Histidine                      | 137.059                               | 136.99891 - 137.11891      |
| Phenylalanine                  | 147.06842                             | 147.008 - 147.128          |
| Arginine                       | 156.10112                             | 156.0411 - 156.1611        |
| Cysteine (carbamidomethylated) | 160.03065                             | 159.95 - 160.11            |
| Cysteine (carboxymethylated)   | 161.01466                             | 160.934 - 161.094          |
| Tyrosine                       | 163.06333                             | 163.003 - 163.123          |
| Tryptophan                     | 186.07932                             | 186.019 - 186.139          |

**Supplementary Table 6.** Primers used for RT-PCR and genomic PCR of tRNA-Leu(CAG) and tRNA-Ser(CAG) from *Saccharomycopsis malanga* (Smal) and *Saccharomycopsis capsularis* (Scaps).

|              |                         |
|--------------|-------------------------|
| Smal_tLeu_F  | TGGCATGGCGGAATTGTG      |
| Smal_tLeu_R  | AGACTCGAACTCATACCTCC    |
| Smal_tSer_F  | TACAGTGGCCGAGTTTGGTTAAG |
| Smal_tSer_R  | CGAACCTGCGAGGGAAATC     |
| Scaps_tLeu_F | CATGGCGGAAATATGGAATACG  |
| Scaps_tLeu_R | GACTCGAACTCATATCTCCTGG  |
| Scaps_tSer_F | CAGTGGCCGAGTTTGGTTAAG   |
| Scaps_tSer_R | TCGAACCTGCGAGGGAAATC    |

**Supplementary Table 7.** Sources of genome sequence data used in this study.

| Group            | Species name                    | Short name | Strain       | Source      | Reference                                                                                                                                                                |
|------------------|---------------------------------|------------|--------------|-------------|--------------------------------------------------------------------------------------------------------------------------------------------------------------------------|
| Saccharomycotina | <i>Alloascoidea hylecoeti</i>   | Allhyl     | JCM 7604     | NCBI        | Unpublished, Genbank Accession IDs: BCKZ01000001-BCKZ01000136                                                                                                            |
|                  | <i>Ambrosiozyma philentoma</i>  | Ambphi     | NRRL Y-7523  | Y1000+      | This study, Genbank Accession ID: NHAR0000000                                                                                                                            |
|                  | <i>Arxula adeninivorans</i>     | Arxade     | LS3          | Genolevures | Kunze G, et al. The complete genome of Blastobotrys ( <i>Arxula</i> ) adeninivorans LS3 - a yeast of biotechnological interest. <i>Biotechnol Biofuels</i> 7, 66 (2014). |
|                  | <i>Ascoidea asiatica</i>        | Ascasi     | JCM 7603     | NCBI        | Unpublished, Genbank Accession IDs: BCKQ01000001-BCKQ01000071                                                                                                            |
|                  | <i>Ascoidea rubescens</i>       | Ascrub     | NRRL Y-17699 | JGI         | Riley R, et al. Comparative genomics of biotechnologically important yeasts. <i>Proc. Natl. Acad. Sci. U.S.A.</i> 113, 9882-9887 (2016).                                 |
|                  | <i>Babjeviella inositovora</i>  | Babino     | NRRL Y-12698 | JGI         | Riley R, et al. Comparative genomics of biotechnologically important yeasts. <i>Proc. Natl. Acad. Sci. U.S.A.</i> 113, 9882-9887 (2016).                                 |
|                  | <i>Candida albicans</i>         | Canalb     | SC5314       | Genolevures | Jones T, et al. The diploid genome sequence of <i>Candida albicans</i> . <i>Proc Natl Acad Sci USA</i> 2004,101:7329-7334.                                               |
|                  | <i>Candida arabinofementans</i> | Canara     | NRRL YB-2248 | JGI         | Riley R, et al. Comparative genomics of biotechnologically important yeasts. <i>Proc. Natl. Acad. Sci. U.S.A.</i> 113, 9882-9887 (2016).                                 |
|                  | <i>Candida boidinii</i> *       | Canboi     | NRRL Y-2332* | Y1000+      | This study, Genbank Accession ID: NHAQ00000000                                                                                                                           |
|                  | <i>Candida parapsilosis</i>     | Canpar     | CDC 317      | Genolevures | Butler G, et al. Evolution of pathogenicity and sexual reproduction in eight <i>Candida</i> genomes. <i>Nature</i> 459, 657-662 (2009).                                  |
|                  | <i>Candida tanzawaensis</i>     | Cantan     | NRRL Y-17324 | JGI         | Riley R, et al. Comparative genomics of biotechnologically important yeasts. <i>Proc. Natl. Acad. Sci. U.S.A.</i> 113, 9882-9887 (2016).                                 |
|                  | <i>Citeromyces matritensis</i>  | Citmat     | NRRL Y-2407  | Y1000+      | This study, Genbank Accession ID: NHAP00000000                                                                                                                           |
|                  | <i>Cyberlindnera jadinii</i>    | Cybjad     | NRRL Y-1542  | JGI         | Riley R, et al. Comparative genomics of biotechnologically important yeasts. <i>Proc. Natl. Acad. Sci. U.S.A.</i> 113, 9882-9887 (2016).                                 |
|                  | <i>Debaryomyces hansenii</i>    | Debhan     | CBS 767      | Genolevures | Dujon B, et al. Genome evolution in yeasts. <i>Nature</i> 430, 35-44 (2004).                                                                                             |
|                  | <i>Dekkera bruxellensis</i>     | Dekbru     | CBS 2499     | JGI         | Piskur J, et al. The genome of wine yeast <i>Dekkera bruxellensis</i> provides a tool to explore its food-                                                               |

related properties. *Int. J. Food Microbiol.* 157, 202-209 (2012).

|                                  |        |              |             |                                                                                                                                                                                                                                                   |
|----------------------------------|--------|--------------|-------------|---------------------------------------------------------------------------------------------------------------------------------------------------------------------------------------------------------------------------------------------------|
| <i>Eremothecium gossypii</i>     | Eregos | ATCC 10895   | Genolevures | Dietrich FS, et al. The <i>Ashbya gossypii</i> Genome as a Tool for Mapping the Ancient <i>Saccharomyces cerevisiae</i> Genome. <i>Science</i> . 2004 Apr 9;304(5668):304-7.                                                                      |
| <i>Geotrichum candidum</i>       | Geocan | CLIB 918     | NCBI        | Morel G, et al. Differential gene retention as an evolutionary mechanism to generate biodiversity and adaptation in yeasts. <i>Sci Rep</i> 5: 11571 (2015).                                                                                       |
| <i>Hanseniaspora uvarum</i>      | Hanuva | AWRI3580     | NCBI        | Sternes, P. R., Lee, D., Kutyna, D. R. & Borneman, A. R. Genome Sequences of Three Species of <i>Hanseniaspora</i> Isolated from Spontaneous Wine Fermentations: TABLE 1. <i>Genome Announc.</i> 4, e01287-16 (2016).                             |
| <i>Hanseniaspora vineae</i>      | Hanvin | T02/19AF     | NCBI        | Giorello FM, et al. Genome Sequence of the Native Apiculate Wine Yeast <i>Hanseniaspora vineae</i> T02/19AF. <i>Genome Announc</i> 2, (2014).                                                                                                     |
| <i>Hyphopichia burtonii</i>      | Hypbur | NRRL Y-1933  | JGI         | Riley R, et al. Comparative genomics of biotechnologically important yeasts. <i>Proc. Natl. Acad. Sci. U.S.A.</i> 113, 9882-9887 (2016).                                                                                                          |
| <i>Kazachstania africana</i>     | Kazafr | CBS 2517     | JGI         | Gordon JL, et al. Evolutionary erosion of yeast sex chromosomes by mating-type switching accidents. <i>Proc. Natl. Acad. Sci. U.S.A.</i> 108, 20024-20029 (2011).                                                                                 |
| <i>Kazachstania naganishii</i>   | Kaznag | CBS 8797     | Genolevures | Gordon JL, et al. Evolutionary erosion of yeast sex chromosomes by mating-type switching accidents. <i>Proc. Natl. Acad. Sci. U.S.A.</i> 108, 20024-20029 (2011).                                                                                 |
| <i>Kluyveromyces lactis</i>      | Klulac | CBS 2359     | Genolevures | Dujon B, et al. Genome evolution in yeasts. <i>Nature</i> 430, 35-44 (2004).                                                                                                                                                                      |
| <i>Komagataella phaffii</i>      | Kompha | GS115        | JGI         | De Schutter K, et al. Genome sequence of the recombinant protein production host <i>Pichia pastoris</i> . <i>Nat. Biotechnol.</i> 27, 561-566 (2009).                                                                                             |
| <i>Kuraishia capsulata</i>       | Kurcap | CBS 1993     | Genolevures | Morales L, et al. Complete DNA sequence of <i>Kuraishia capsulata</i> illustrates novel genomic features among budding yeasts (Saccharomycotina). <i>Genome Biol Evol.</i> 2013;5(12):2524-39.                                                    |
| <i>Lachancea kluyveri</i>        | Lacklu | CBS 3082     | Genolevures | Genolevures Consortium, et al. Comparative genomics of protoploid Saccharomycetaceae. <i>Genome Res.</i> 2009 Oct;19(10):1696-709.                                                                                                                |
| <i>Lachancea meyersi</i>         | Lacmey | CBS 8951     | Genolevures | Vakirlis N, et al. Reconstruction of ancestral chromosome architecture and gene repertoire reveals principles of genome evolution in a model yeast genus. <i>Genome Res.</i> 2016 Jul;26(7):918-32. doi: 10.1101/gr.204420.116. Epub 2016 May 31. |
| <i>Lachancea thermotolerans</i>  | Lacthe | CBS 6340     | Genolevures | Genolevures Consortium, et al. Comparative genomics of protoploid Saccharomycetaceae. <i>Genome Res.</i> 2009 Oct;19(10):1696-709.                                                                                                                |
| <i>Lipomyces starkeyi</i>        | Lipsta | NRRL Y-11557 | JGI         | Riley R, et al. Comparative genomics of biotechnologically important yeasts. <i>Proc. Natl. Acad. Sci. U.S.A.</i> 113, 9882-9887 (2016).                                                                                                          |
| <i>Metschnikowia bicuspidata</i> | Metbic | NRRL TB-4993 | JGI         | Riley R, et al. Comparative genomics of biotechnologically important yeasts. <i>Proc. Natl. Acad. Sci. U.S.A.</i> 113, 9882-9887 (2016).                                                                                                          |

|                                         |        |              |             |                                                                                                                                                                                                                                                           |
|-----------------------------------------|--------|--------------|-------------|-----------------------------------------------------------------------------------------------------------------------------------------------------------------------------------------------------------------------------------------------------------|
| <i>Millerozyma acaciae</i>              | Milaca | JCM 10732    | NCBI        | Unpublished, Genbank Accession IDs: BCKO01000001-BCKO01000010                                                                                                                                                                                             |
| <i>Nadsonia fulvescens var elongata</i> | Nadful | DSM 6958     | JGI         | Riley R, et al. Comparative genomics of biotechnologically important yeasts. Proc. Natl. Acad. Sci. U.S.A. 113, 9882-9887 (2016).                                                                                                                         |
| <i>Nakazawaea peltata</i>               | Nakpel | JCM 9829     | NCBI        | Unpublished, Genbank Accession IDs: BCGQ01000001-BCGQ01000011                                                                                                                                                                                             |
| <i>Nakazawaea wickerhamii</i>           | Nakwic | NRRL Y-2563  | Y1000+      | This study, Genbank Accession ID: NHAO00000000                                                                                                                                                                                                            |
| <i>Naumovozyma castellii</i>            | Naucas | CBS 4309     | Genolevures | Gordon JL, et al. Evolutionary erosion of yeast sex chromosomes by mating-type switching accidents. Proc. Natl. Acad. Sci. U.S.A. 108, 20024-20029 (2011).                                                                                                |
| <i>Ogataea polymorpha</i>               | Ogapol | NCYC 495     | JGI         | Riley R, et al. Comparative genomics of biotechnologically important yeasts. Proc. Natl. Acad. Sci. U.S.A. 113, 9882-9887 (2016).                                                                                                                         |
| <i>Pachysolen tannophilus</i>           | Pactan | NRRL Y-2460  | JGI         | Riley R, et al. Comparative genomics of biotechnologically important yeasts. Proc. Natl. Acad. Sci. U.S.A. 113, 9882-9887 (2016).                                                                                                                         |
| <i>Peterozyma xylosa</i>                | Petxyl | NRRL Y-12939 | Y1000+      | This study, Genbank Accession ID: NHAN00000000                                                                                                                                                                                                            |
| <i>Pichia kudriavzevii</i>              | Pickud | M12          | NCBI        | Chan GF, et al. Genome sequence of Pichia kudriavzevii M12, a potential producer of bioethanol and phytase. Eukaryotic Cell 11, 1300-1301 (2012).                                                                                                         |
| <i>Pichia membranifaciens</i>           | Picmem | CBS 107      | JGI         | Riley R, et al. Comparative genomics of biotechnologically important yeasts. Proc. Natl. Acad. Sci. U.S.A. 113, 9882-9887 (2016).                                                                                                                         |
| <i>Priceomyces haplophilus</i>          | Prihap | JCM 1635     | NCBI        | Unpublished, Genbank Accession IDs: BCIF01000001-BCIF01000009                                                                                                                                                                                             |
| <i>Saccharomyces cerevisiae</i>         | Saccer | S288C        | SGD         | Goffeau A, et al. Life with 6000 genes. Science 274, 546, 563-567 (1996).                                                                                                                                                                                 |
| <i>Saccharomycopsis capsularis</i>      | Saccap | NRRL Y-17639 | Y1000+      | This study, Genbank Accession ID: NHAM00000000                                                                                                                                                                                                            |
| <i>Saccharomycopsis fibuligera</i>      | Sacfib | KPH12        | NCBI        | Choo, J. H. et al. Whole-genome de novo sequencing, combined with RNA-Seq analysis, reveals unique genome and physiological features of the amylolytic yeast Saccharomycopsis fibuligera and its interspecies hybrid. Biotechnol. Biofuels 9, 246 (2016). |
| <i>Saccharomycopsis malanga</i>         | Sacmal | JCM 7620     | NCBI        | Unpublished, Genbank Accession IDs: BCGJ01000001-BCGJ01000044                                                                                                                                                                                             |
| <i>Saturnispora dispersa</i>            | Satdis | NRRL Y-1447  | Y1000+      | This study, Genbank Accession ID: NHAL00000000                                                                                                                                                                                                            |
| <i>Scheffersomyces stipitis</i>         | Schsti | CBS 6054     | JGI         | Jeffries TW, et al. Genome sequence of the lignocellulose-bioconverting and xylose-fermenting yeast Pichia stipitis. Nat. Biotechnol. 25, 319-326 (2007).                                                                                                 |
| <i>Sporopachydermia quercuum</i>        | Spoque | JCM 9486     | NCBI        | Unpublished, Genbank Accession IDs: BCGN01000001-BCGN01000015                                                                                                                                                                                             |
| <i>Tortispora caseinolytica</i>         | Torcas | NRRL Y-17796 | JGI         | Riley R, et al. Comparative genomics of biotechnologically important yeasts. Proc. Natl. Acad. Sci.                                                                                                                                                       |

U.S.A. 113, 9882-9887 (2016).

|           |                                  |        |              |             |                                                                                                                                                                                                                                                                                                                                |
|-----------|----------------------------------|--------|--------------|-------------|--------------------------------------------------------------------------------------------------------------------------------------------------------------------------------------------------------------------------------------------------------------------------------------------------------------------------------|
|           | <i>Wickerhamomyces anomalus</i>  | Wicano | NRRL Y-366-8 | JGI         | Riley R, et al. Comparative genomics of biotechnologically important yeasts. Proc. Natl. Acad. Sci. U.S.A. 113, 9882-9887 (2016).                                                                                                                                                                                              |
|           | <i>Yarrowia lipolytica</i>       | Yarlip | CLIB122      | Genolevures | Dujon B, et al. Genome evolution in yeasts. Nature 430, 35-44 (2004).                                                                                                                                                                                                                                                          |
|           | <i>Zygosaccharomyces rouxii</i>  | Zygrou | CBS 732      | Genolevures | Genolevures Consortium, et al. Comparative genomics of protoploid Saccharomycetaceae. Genome Res. 19, 1696-1709 (2009).                                                                                                                                                                                                        |
| Outgroups | <i>Schizosaccharomyces pombe</i> | Schpom | 972h         | JGI         | Wood V, et al. The genome sequence of Schizosaccharomyces pombe. Science, (2002)                                                                                                                                                                                                                                               |
|           | <i>Aspergillus nidulans</i>      | Aspnid | FGSC A4      | JGI         | Arnaud MB, et al. The Aspergillus Genome Database (AspGD): recent developments in comprehensive multispecies curation, comparative genomics and community resources. Nucleic Acids Res, (2012); Galagan JE et al. Sequencing of Aspergillus nidulans and comparative analysis with A. fumigatus and A. oryzae. Nature, (2005). |

\* For *Candida boidinii*, strain GF002 was used for the phylogenomic analysis, and strain NRRL Y-2332 was used for all other analyses including LC-MS/MS cultures. Reference for strain GF002: Borelli G, et al. De Novo Assembly of *Candida sojae* and *Candida boidinii* Genomes, Unexplored xylose-consuming yeasts with potential for renewable biochemical production. Genome Announc. 2016;4(1):e01551-15.

| Website     | URL                                                                                                                                                          |
|-------------|--------------------------------------------------------------------------------------------------------------------------------------------------------------|
| Genolevures | <a href="http://www.genolevures.org/download.html#">http://www.genolevures.org/download.html#</a> OR <a href="http://gryc.inra.fr/">http://gryc.inra.fr/</a> |
| JGI         | <a href="http://genome.jgi.doe.gov/saccharomycotina/saccharomycotina.info.html">http://genome.jgi.doe.gov/saccharomycotina/saccharomycotina.info.html</a>    |
| 1002YGP     | <a href="http://1002genomes.u-strasbg.fr/index.html">http://1002genomes.u-strasbg.fr/index.html</a>                                                          |
| NCBI        | <a href="http://www.ncbi.nlm.nih.gov/genome/">http://www.ncbi.nlm.nih.gov/genome/</a>                                                                        |
| SSS         | <a href="http://www.saccharomycessensustricto.org/cgi-bin/s3.cgi">http://www.saccharomycessensustricto.org/cgi-bin/s3.cgi</a>                                |
| SGD         | <a href="http://www.yeastgenome.org/">http://www.yeastgenome.org/</a>                                                                                        |
| Y1000+      | <a href="https://y1000plus.wei.wisc.edu/">https://y1000plus.wei.wisc.edu/</a>                                                                                |

## Supplementary Note 1

### Separate origins of the two $tS^{CAG}$ genes and the $tA^{CAG}$ gene

tRNA<sup>Ser</sup>(CAG) of the Ser1 clade has been studied extensively in *Candida* species. In this clade it is the product of a single gene or two genes coding for identical tRNAs, and we designate this gene family  $tS^{CAG}-A$ . (To simplify discussion of tRNA genes, we use a suffix such as  $-A$  or  $-B$  to denote each orthogroup of orthologous tRNA genes across different species.)  $tS^{CAG}-A$  was formed by mutating the anticodon of a gene for a different tRNA<sup>Ser</sup> isoacceptor, proposed to have been either  $tS^{AGA}$  (ref. <sup>11</sup>) or  $tS^{CGA}$  (refs. <sup>12,13</sup>). These putative source genes code for tRNAs that translate the 4-codon box of UCN serine codons (Fig. 1). Our phylogenetic analysis (Supplementary Fig. 6) confirms that  $tS^{CAG}-A$  is monophyletic within the Ser1 clade and that its source was one of the 4-codon box genes, most likely a  $tS^{AGA}$  or  $tS^{UGA}$  gene, both of which occur in multiple copies in all Ser1 clade species. Conversion of an AGA, UGA or CGA anticodon into CAG by point mutation would require two or three point mutations, and the intermediate steps would cause the tRNA<sup>Ser</sup> to mistranslate codons for other amino acids which seems maladaptive. However, as previously noted<sup>11,12</sup>, the Ser1 clade  $tS^{CAG}-A$  gene could have been formed from  $tS^{AGA}$  or  $tS^{CGA}$  in a single step, by inserting a base into the anticodon (AGA → CAGA, or CGA → CAGA). This mutation would change the anticodon sequence to CAG and would not enlarge the anticodon loop if there was an intron in the gene, because the splice donor site would also shift by 1 nucleotide.

In contrast, the  $tS^{CAG}$  gene in Ser2 clade species,  $tS^{CAG}-B$ , is derived from a  $tS^{GCU}$  gene coding for the tRNA that translates the 2-codon box of AGY serine codons, as shown by phylogenetic analysis (Supplementary Fig. 7).  $tS^{CAG}-B$  is more similar to  $tS^{GCU}$  than to  $tS^{AGA}$ ,  $tS^{UGA}$  and  $tS^{CGA}$ , whereas the opposite is true of  $tS^{CAG}-A$ . In a phylogenetic tree that includes both of the novel  $tS^{CAG}$  genes with some outgroup species,  $tS^{CAG}-A$  and  $tS^{CAG}-B$  again cluster with the 4-codon and 2-codon box tRNA genes respectively (Supplementary Fig. 8). Thus, the  $tS^{CAG}$  genes of the Ser1 and Ser2 clades have separate evolutionary origins, by mutation of different source genes, which supports the phylogenomic evidence that these clades underwent separate reassignments of CUG from Leu to Ser.  $tS^{CAG}-B$  is a single-copy gene in all Ser2 clade species except *Ascoidea asiatica* which has two highly similar copies. There are 3-6  $tS^{GCU}$  genes in Ser2 clade species. There is no obvious way to convert a GCU anticodon into a CAG anticodon except by three separate point mutations, which is not possible without intermediate steps in which the mutant tRNA<sup>Ser</sup> mistranslates codons for at least one other amino acid. The least disruptive route appears to be GCU → GCG → CCG → CAG, by which the tRNA<sup>Ser</sup> would mistranslate the rare Arg codons CGC and CGG, competing with the normal tRNA<sup>Arg</sup> molecules.



There is high sequence divergence among the  $tA^{CAG}$  genes of the four Ala clade species, but these single-copy genes share a conserved genomic location (Supplementary Fig. 5), therefore they are orthologous. Phylogenetic analysis indicates that  $tA^{CAG}$  is derived from a  $tA^{AGC}$  gene (not  $tA^{UGC}$  as proposed previously<sup>13</sup>), probably by a 1-base insertion into the anticodon loop similar to the mechanism proposed for  $tS^{CAG}-A$  in *Candida* species<sup>11,12</sup>, but a 1-base deletion is also required because the tRNA<sup>Ala</sup> genes do not contain introns. There are 3-8  $tA^{AGC}$  genes in each Ala clade species, so it is likely that the common ancestor of these species also had a multigene family, of which one member mutated to become  $tA^{CAG}$  while the others retained the AGC anticodon.

## Supplementary Note 2

### Retention of $tL^{CAG}$ as well as $tS^{CAG}$ in the Ser2 clade

All five examined species in the Ser2 clade have the  $tS^{CAG}-B$  gene that was formed by mutating a  $tS^{GCU}$  gene. Four of them also have a second tRNA gene with anticodon CAG, which we infer is a  $tL^{CAG}$  gene that has been retained since the common ancestor of the Ser2 and Leu1 clades. It contains several conserved bases characteristic of tRNA<sup>Leu</sup> including the positions G<sub>37</sub> and A<sub>73</sub> that confer Leu rather than Ser identity<sup>1,4</sup> (Supplementary Fig. 9a), and it lacks the multiple G:C basepairs in the extra arm that are characteristic of tRNAs charged with Ser<sup>14</sup>. This gene has a conserved syntenic location beside the protein-coding gene *TRM1* in species of the Ser2 and Leu1 clades (Supplementary Fig. 9b), and the Ser2 and Leu1  $tL^{CAG}$  sequences cluster in a phylogenetic tree (Supplementary Fig. 9c), so we infer that they are orthologs and hence that this gene existed in the common ancestor of the Leu1 and Ser2 clades. We designate this group of orthologous genes  $tL^{CAG}-Z$ .

Despite the presence of its gene, tRNA<sup>Leu</sup>(CAG) does not appear to play any significant role in translation in Ser2 clade species. In the peptides sequenced *de novo* from *Saccharomyces capsularis* using PEAKS software, 53 genomic CUG (CTG) sites were found to be translated as Ser, and none as Leu (Supplementary Data 3). In peptide mass fingerprinting analysis of the same *S. capsularis* LC-MS/MS data using MaxQuant software, 86 genomic CUG sites were covered by spectra with b- and/or y-ion support. Of these, 78 were translated as Ser, 1 as Leu or Ile, and 7 as other amino acids (Supplementary Table 1). The single detected incorporation of Leu/Ile is similar to the background levels of incorporation of ‘incorrect’ amino acids seen in other species and at other codons (Supplementary Table 1), occurred in a very short peptide (8 amino acids), and could be explained by many factors including possible error or heterozygosity in the genome sequence. By reverse-transcriptase PCR of RNA samples from *S. capsularis* and *S. malanga* cultures grown in YPD media, we detected transcription of  $tS^{CAG}-B$  but not  $tL^{CAG}-Z$  in both species (Supplementary Fig. 10).

However, sequence alignment among the three *Saccharomycopsis* species shows that their  $tL^{CAG}$ -Z genes are conserved to a greater extent than the surrounding noncoding DNA (Supplementary Fig. 11), which indicates that the gene is being maintained by natural selection and must therefore retain some function. It is possible that *Saccharomycopsis* species require this tRNA in a specific growth condition<sup>15</sup> that we did not examine (for example, meiosis), or even that it is maintained for a function other than translation<sup>16,17</sup>. The fact that  $tL^{CAG}$ -Z is not present in *Ascoidea rubescens* suggests that its function in Ser2 clade species is not essential.

### Supplementary Note 3

#### Losses of $tL^{CAG}$ and reorganization of CUN-Leu decoding in Leu1 and Leu2 clades

The reassignments of the CUG codon in the Ala, Ser1, and Ser2 clades occurred within a broader context of reorganization of how CUN codons are translated in yeasts. Even among the species that retained the CUG-Leu translation, there have been extensive evolutionary changes in how this translation is achieved, with multiple species losing  $tL^{CAG}$  completely and others showing displacement of an ancestral  $tL^{CAG}$  by a paralog<sup>13</sup>, as summarized in Fig. 4 and described below.

*Orthogroups of  $tL^{CAG}$  genes.* By phylogenetic analysis, we identified six orthogroups of  $tL^{CAG}$  in Saccharomycotina, which we designated  $tL^{CAG}$ -P, -Z, -L, -T, -Q and -R. Each orthogroup consists of a set of  $tL^{CAG}$  genes that appear to be orthologs in different species (Supplementary Fig. 9c). Orthogroup  $tL^{CAG}$ -P is ancestral to the Leu2 clade; orthogroup  $tL^{CAG}$ -Z is ancestral to the Leu1+Ser2 clades; and orthogroup  $tL^{CAG}$ -L is ancestral to the Leu0 group of species (Fig. 4). These three orthogroups share a close phylogenetic relationship and are putatively inter-clade orthologs of one another. We refer to them as ancestral  $tL^{CAG}$  genes. These ancestral  $tL^{CAG}$  genes (P, Z, and L) occur in only one or two copies in the genomes that contain them (Supplementary Fig. 13). The other three orthogroups (T, Q and R) are not ancestral. Orthogroup  $tL^{CAG}$ -T is present only in three *Lachancea* (Leu1) species and these genes have a telomeric location. Orthogroups  $tL^{CAG}$ -Q and -R are present only in some Leu2 clade species (Supplementary Figs 9c, 13). The limited phylogenetic distributions of orthogroups T, Q and R, their distant relationship to the ancestral orthogroups P, Z and L, and their presence only in genomes that lack the ancestral genes, suggest that they were probably acquired by horizontal gene transfer.

*Three losses of  $tL^{CAG}$  in the Leu1 clade, and one in the Leu2 clade.* Complete loss of all  $tL^{CAG}$  genes occurred at least four times in species that retained the standard code (Fig. 4), in addition to the

three losses in clades whose genetic codes changed. In the Leu1 clade,  $tL^{CAG}$ -Z was lost in the common ancestor of *Saccharomyces* and *Zygosaccharomyces*, in all *Hanseniaspora* species, and in most species of *Lachancea* (represented by *L. meyersi* in Supplementary Fig. 13). In the Leu2 clade,  $tL^{CAG}$ -P was lost in an ancestor of *Candida arabinofementans*. These species have no  $tRNA^{Leu}(CAG)$  and instead probably read CUG by wobble using  $tRNA^{Leu}(UAG)$  with an unmodified  $U_{34}$  base as occurs in *S. cerevisiae*<sup>18</sup>. Other species in the Leu1 and Leu2 clades lost their ancestral  $tL^{CAG}$ -Z or  $tL^{CAG}$ -P gene but replaced it by acquiring a paralogous  $tL^{CAG}$  from a different orthogroup:  $tL^{CAG}$ -T in *L. thermotolerans* and two closely related *Lachancea* species, and  $tL^{CAG}$ -Q and  $tL^{CAG}$ -R in the common ancestor of many Leu2 clade species including *Pichia kudriavzevii* (Supplementary Figs 9c, 13).

*Intron expansion in Leu1 clade  $tL^{CAG}$ .* The losses of  $tL^{CAG}$ -Z in the Leu1 clade appear to have been preceded by an extraordinary expansion of the intron in this gene. tRNA introns are typically short; the interquartile range among 3,723 tRNA introns in the yeast species we studied is 15–31 nt. However, the introns of  $tL^{CAG}$ -Z in the genera *Kluyveromyces* and *Eremothecium*, and in *Lachancea kluyveri* (the only *Lachancea* species that retains the ancestral gene), range from 134–318 nt, making them the longest canonical tRNA introns known in yeasts (Supplementary Fig. 12) or any eukaryote<sup>19</sup>. The long introns contain extensive predicted secondary structure that may slow the rate of formation of the mature spliced and base-modified tRNA. Expansion of the intron may have been a response to a killer toxin, because the intron is located in the anticodon loop. Anticodon nucleases recognize the anticodon loop and are unlikely to cleave pre-tRNAs until after splicing occurs, and in some cases also require base modification of the tRNA<sup>20-23</sup>. In the standard numbering system for base positions in tRNAs, the anticodon is at positions 34–36, introns are located between positions 37 and 38, and killer toxin nucleases cleave between positions 34 and 35 within the anticodon.

*Reorganization of CUN codon:anticodon wobble in the Leu1 clade.* Across the whole genetic code table, most yeast species use similar repertoires of tRNA anticodons for translation<sup>24,25</sup>, even though they can vary widely in the number of genes for different isoacceptors. The last common ancestor of Saccharomycotina translated CUN as Leu using three  $tRNA^{Leu}$  isoacceptors with anticodons AAG (modified to IAG, decoding CUU and CUC codons), UAG (decoding CUA), and CAG (decoding CUG). This configuration is present in the paraphyletic Leu0 group of species which includes the root of the tree (Fig. 2; Supplementary Fig. 13). However, the Leu1 clade (excluding *Cyberlindnera* and *Wickerhamomyces*) underwent three evolutionary changes to the wobble arrangements for CUN-Leu decoding:

- The ‘tRNA sparing’ rule<sup>24</sup> was broken. Eukaryotes almost invariably use anticodons with  $A_{34}$  rather than  $G_{34}$  to read NYY codons<sup>24</sup>. In other words they use anticodon AAG (modified to IAG) rather than GAG to read the Leu codons CUU and CUC, whereas bacteria

do the opposite. This is true of most Saccharomycotina, but a switch to the bacterial pattern occurred in the main part of the Leu1 clade after it separated from *Cyberlindnera* and *Wickerhamomyces*.

- In the genera *Naumovozyma* and *Kazachstania* the normal eukaryotic ‘tRNA sparing’ pattern was subsequently reinstated, by losing  $tL^{GAG}$  and making new  $tL^{AAG}$  genes.
- In *Hanseniaspora vineae* and *H. osmophila*,  $tL^{GAG}$  was lost and tRNA<sup>Leu</sup>(UAG) now reads all four CUN codons.

## Supplementary References

- 1 Giegé, R., Sissler, M. & Florentz, C. Universal rules and idiosyncratic features in tRNA identity. *Nucleic Acids Res.* **26**, 5017-5035 (1998).
- 2 Gordon, J. L., Byrne, K. P. & Wolfe, K. H. Additions, losses and rearrangements on the evolutionary route from a reconstructed ancestor to the modern *Saccharomyces cerevisiae* genome. *PLoS Genet.* **5**, e1000485 (2009).
- 3 Suzuki, T., Ueda, T. & Watanabe, K. The 'polysemous' codon--a codon with multiple amino acid assignment caused by dual specificity of tRNA identity. *EMBO J.* **16**, 1122-1134 (1997).
- 4 Huang, Q., Yao, P., Eriani, G. & Wang, E. D. In vivo identification of essential nucleotides in tRNA<sup>Leu</sup> to its functions by using a constructed yeast tRNA<sup>Leu</sup> knockout strain. *Nucleic Acids Res.* **40**, 10463-10477 (2012).
- 5 Johansson, M. J. & Bystrom, A. S. Dual function of the tRNA (m(5)U54) methyltransferase in tRNA maturation. *RNA* **8**, 324-335 (2002).
- 6 Arimbasseri, A. G., Blewett, N. H., Iben, J. R., Lamichhane, T. N., Cherkasova, V., Hafner, M. & Maraia, R. J. RNA polymerase III output is functionally linked to tRNA dimethyl-G26 modification. *PLoS Genet.* **11**, e1005671 (2015).
- 7 Simao, F. A., Waterhouse, R. M., Ioannidis, P., Kriventseva, E. V. & Zdobnov, E. M. BUSCO: assessing genome assembly and annotation completeness with single-copy orthologs. *Bioinformatics* **31**, 3210-3212 (2015).
- 8 Shimodaira, H. An approximately unbiased test of phylogenetic tree selection. *Syst. Biol.* **51**, 492-508 (2002).
- 9 Shimodaira, H. & Hasegawa, M. Multiple comparisons of log-likelihoods with applications to phylogenetic Inference. *Mol. Biol. Evol.* **16**, 1114-1116 (1999).
- 10 Fukuhara, H. Linear DNA plasmids of yeasts. *FEMS Microbiol. Lett.* **131**, 1-9 (1995).
- 11 Yokogawa, T., Suzuki, T., Ueda, T., Mori, M., Ohama, T., Kuchino, Y., Yoshinari, S., Motoki, I., Nishikawa, K., Osawa, S. & et al. Serine tRNA complementary to the nonuniversal serine codon CUG in *Candida cylindracea*: evolutionary implications. *Proc. Natl. Acad. Sci. USA* **89**, 7408-7411 (1992).
- 12 Massey, S. E., Moura, G., Beltrao, P., Almeida, R., Garey, J. R., Tuite, M. F. & Santos, M. A. Comparative evolutionary genomics unveils the molecular mechanism of reassignment of the CTG codon in *Candida* spp. *Genome Res.* **13**, 544-557 (2003).
- 13 Mühlhausen, S., Findeisen, P., Plessmann, U., Urlaub, H. & Kollmar, M. A novel nuclear genetic code alteration in yeasts and the evolution of codon reassignment in eukaryotes. *Genome Res.* **26**, 945-955 (2016).
- 14 Moura, G. R., Paredes, J. A. & Santos, M. A. Development of the genetic code: insights from a fungal codon reassignment. *FEBS Lett.* **584**, 334-341 (2010).
- 15 Prat, L., Heinemann, I. U., Aerni, H. R., Rinehart, J., O'Donoghue, P. & Soll, D. Carbon source-dependent expansion of the genetic code in bacteria. *Proc. Natl. Acad. Sci. USA* **109**, 21070-21075 (2012).
- 16 Murray, L. E., Rowley, N., Dawes, I. W., Johnston, G. C. & Singer, R. A. A yeast glutamine tRNA signals nitrogen status for regulation of dimorphic growth and sporulation. *Proc. Natl. Acad. Sci. USA* **95**, 8619-8624 (1998).
- 17 Katz, A., Elgamal, S., Rajkovic, A. & Ibba, M. Non-canonical roles of tRNAs and tRNA mimics in bacterial cell biology. *Mol. Microbiol.* **101**, 545-558 (2016).
- 18 Johansson, M. J., Esberg, A., Huang, B., Bjork, G. R. & Bystrom, A. S. Eukaryotic wobble uridine modifications promote a functionally redundant decoding system. *Mol. Cell. Biol.* **28**, 3301-3312 (2008).
- 19 Yoshihisa, T. Handling tRNA introns, archaeal way and eukaryotic way. *Front. Genet.* **5**, 213 (2014).
- 20 Lu, J., Huang, B., Esberg, A., Johansson, M. J. & Bystrom, A. S. The *Kluyveromyces lactis* gamma-toxin targets tRNA anticodons. *RNA* **11**, 1648-1654 (2005).

- 21 Satwika, D., Klassen, R. & Meinhardt, F. Anticodon nuclease encoding virus-like elements in yeast. *Appl. Microbiol. Biotechnol.* **96**, 345-356 (2012).
- 22 Chakravarty, A. K., Smith, P., Jalan, R. & Shuman, S. Structure, mechanism, and specificity of a eukaryal tRNA restriction enzyme involved in self-nonsel self discrimination. *Cell Reports* **7**, 339-347 (2014).
- 23 Hopper, A. K. Transfer RNA post-transcriptional processing, turnover, and subcellular dynamics in the yeast *Saccharomyces cerevisiae*. *Genetics* **194**, 43-67 (2013).
- 24 Marck, C., Kachouri-Lafond, R., Lafontaine, I., Westhof, E., Dujon, B. & Grosjean, H. The RNA polymerase III-dependent family of genes in hemiascomycetes: comparative RNomics, decoding strategies, transcription and evolutionary implications. *Nucleic Acids Res.* **34**, 1816-1835 (2006).
- 25 Kollmar, M. & Mühlhausen, S. How tRNAs dictate nuclear codon reassignments: Only a few can capture non-cognate codons. *RNA Biol.* **14**, 293-299 (2017).
